# Supplementary material for: Simple pyrazoles as efficient organocatalysts for alkyne–CO2 carboxylation and one-pot construction of heterocycles
Source: Royal Society of Chemistry journal article supplement (doi:10.1039/d4qo00237g), 2024-01-01
Supplement: d4qo00237g1.pdf [file d4qo00237g1.pdf]

**Electronic Supplementary Information**

**Simple pyrazoles as efficient organocatalysts for alkyne-CO<sub>2</sub> carboxylation  
and one-pot construction of heterocycles**

*Lin Zhang, Gen Li, En-Hui Xing, Yawei Liu, Chen Jin, Zelin Du, Yan Xu, Dawei Zhang and En-Qing*

*Gao\**

\*Corresponding author. Email: [egao@chem.ecnu.edu.cn](mailto:egao@chem.ecnu.edu.cn)

## Contents

|                                                                                                         |    |
|---------------------------------------------------------------------------------------------------------|----|
| S1 General information .....                                                                            | 3  |
| S2 Experimental section .....                                                                           | 4  |
| S3 Catalytic carboxylation of phenylacetylene ( <b>1a</b> ) with CO <sub>2</sub> .....                  | 5  |
| S4 Comparison of Me <sub>2</sub> Pz with the reported catalysts .....                                   | 7  |
| S5 Mechanism exploration.....                                                                           | 8  |
| S5.1 Interactions between azoles and Cs <sub>2</sub> CO <sub>3</sub> .....                              | 8  |
| S5.2 Formation of the Pz-CO <sub>2</sub> adduct .....                                                   | 10 |
| S5.3 Carboxylation of <b>1a</b> with Cs(Pz <sup>13</sup> CO <sub>2</sub> ) .....                        | 11 |
| S5.4 Interaction between <b>1a</b> and Cs <sub>2</sub> CO <sub>3</sub> .....                            | 12 |
| S5.5 Interaction between <b>1a</b> and Cs(PzCO <sub>2</sub> ).....                                      | 12 |
| S6 Synthesis and characterization for propiolic acids ( <b>2</b> ) .....                                | 14 |
| S7 Synthesis and characterization for propiolic acid esters ( <b>3</b> ).....                           | 18 |
| S8 Synthesis and characterization for 4H-quinazolin-4-ones ( <b>4</b> ) .....                           | 20 |
| S9 Synthesis and characterization for 2H-pyran-2-one ( <b>5</b> ) .....                                 | 22 |
| S10 Synthesis and characterization for 3-cyano-6-hydroxy-2-pyridones ( <b>6</b> ).....                  | 24 |
| S11 Synthesis and characterization for 3a-hydroxyisoxazolo[3,2-a]isoindol-8(3aH)-ones ( <b>7</b> )..... | 25 |
| S12 Synthesis and characterization for imidazole-4-carboxylic derivatives ( <b>9</b> ) .....            | 27 |
| S13 X-ray crystallographic study .....                                                                  | 28 |
| S14 References .....                                                                                    | 29 |
| S15 Copies of <sup>1</sup> H NMR spectra of products.....                                               | 31 |

## S1 General information

$^1\text{H}$  and  $^{13}\text{C}$  spectra were collected on 300 MHz, 400 MHz or 500 MHz NMR spectrometers (Bruker AVANCE) using  $\text{CDCl}_3$ ,  $\text{DMSO}-d_6$  solution. For mechanism studies, NMR spectra were recorded in anhydrous DMSO, with positioning of a glass capillary filled with  $\text{D}_2\text{O}$  inside the NMR tube for magnetic field locking.  $^1\text{H}$  chemical shifts ( $\delta_{\text{H}}$ ) are expressed in parts per million (ppm) and reported relative to the internal standard  $\text{CDCl}_3$  ( $\delta_{\text{H}} = 7.26$  ppm) or  $\text{DMSO}-d_6$  ( $\delta_{\text{H}} = 2.50$  ppm), or relative to the external standard DMSO ( $\delta_{\text{H}} = 2.50$  ppm) in a  $\text{D}_2\text{O}$  capillary.  $^{13}\text{C}$  chemical shifts ( $\delta_{\text{C}}$ ) are expressed in ppm and reported relative to the internal standard  $\text{DMSO}-d_6$  ( $\delta_{\text{C}} = 39.6$  ppm), or relative to the external standard DMSO ( $\delta_{\text{C}} = 39.4$  ppm) in a  $\text{D}_2\text{O}$  capillary. Silica gel (300 - 400 mesh) was used for flash column chromatograph, eluting with ethyl acetate/petroleum ether (60 - 90 °C) mixture. Unless otherwise noted, the chemicals and reagents were purchased in analytical purity from commercial sources and used directly without further purification. Anhydrous DMSO was further dried over molecular sieve.

## S2 Experimental section

**General procedure for catalytic carboxylation.** The catalyst and base were added to a Schlenk tube. After three times of atmosphere exchange with CO<sub>2</sub>, the reactor was equipped with a CO<sub>2</sub> balloon and heated in an oil bath. Then 1.0 mmol terminal alkyne dissolved in 3 mL solution was injected under stirring to start the reaction. After stirring at required temperature for specified time, the reaction was quenched with water (15 mL). The resultant solution was washed with CH<sub>2</sub>Cl<sub>2</sub> to separate the catalyst and any unreacted alkyne. The aqueous phase was acidified with 1 M HCl to pH = 1 and then extracted with ethyl acetate (15 mL × 3). The combined organic phase was washed with saturated NaCl solution and dried over anhydrous MgSO<sub>4</sub>. The solvent was removed under vacuum to obtain the product, which was weighed for yield calculations.

**Catalyst recovery.** A scale-up catalytic reaction was performed in a 250 mL flask by following the typical procedure with 10 mmol **1a**, 1.0 mmol Me<sub>2</sub>Pz and 15 mmol Cs<sub>2</sub>CO<sub>3</sub> in 20 mL DMSO. The reaction was performed at 80 °C until the alkyne was completely consumed as indicated by TLC. After addition of 100 mL water, the solution was extracted with CH<sub>2</sub>Cl<sub>2</sub> (3 × 100 mL). The combined extracts were washed with aqueous NaHCO<sub>3</sub>, dried over MgSO<sub>4</sub> and evaporated in vacuo. The solid thus obtained was confirmed by NMR to be Me<sub>2</sub>Pz with satisfactory purity. The recovery rate is 95%. The aqueous phase after above extraction was treated by typical procedures to give **2a** in a yield of about 99%.

### S3 Catalytic carboxylation of phenylacetylene (**1a**) with CO<sub>2</sub>

Table S1. Additional control tests with potential catalysts <sup>a</sup>

|                                                                                                                                                                                                                              |                                                                                   |                                                                                   |                                                                                    |                               |
|------------------------------------------------------------------------------------------------------------------------------------------------------------------------------------------------------------------------------|-----------------------------------------------------------------------------------|-----------------------------------------------------------------------------------|------------------------------------------------------------------------------------|-------------------------------|
| $\text{Ph-C}\equiv\text{CH} \text{ (1a) } + \text{CO}_2 \xrightarrow[\text{Cs}_2\text{CO}_3, \text{ DMSO}, 60^\circ\text{C}, 6\text{ h}]{\text{Cat.}} \xrightarrow{\text{HCl}} \text{Ph-C}\equiv\text{CH-COOH} \text{ (2a)}$ |                                                                                   |                                                                                   |                                                                                    |                               |
| Cat.                                                                                                                                                                                                                         | None                                                                              | 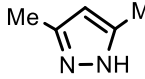 | 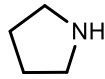  | <i>n</i> Bu <sub>4</sub> NOAc |
| Yield                                                                                                                                                                                                                        | 30%                                                                               | 96%                                                                               | 36%                                                                                | 30%                           |
| Cat.                                                                                                                                                                                                                         | 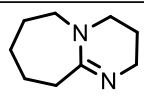 | 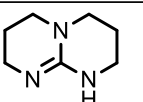 | 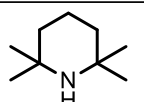 |                               |
|                                                                                                                                                                                                                              | DBU                                                                               | TBD                                                                               | TMP                                                                                |                               |
| Yield                                                                                                                                                                                                                        | 28%                                                                               | 36%                                                                               | 34%                                                                                |                               |

<sup>a</sup> Reaction conditions: **1a** (1.0 mmol), catalyst (0.1 mmol, 10 mol%), Cs<sub>2</sub>CO<sub>3</sub> (1.5 mmol, 1.5 eq.), CO<sub>2</sub> (balloon), DMSO (3 mL), 60 °C, 6 h; isolated yield.

Table S2. Optimization of carboxylation of **1a** with CO<sub>2</sub><sup>a</sup>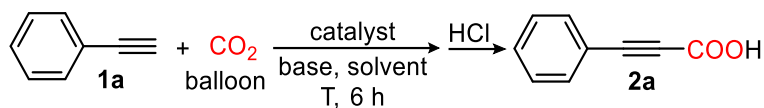

| Entry | Catalyst (mol%)         | Base                            | Solvent            | T/°C | Yield/% |
|-------|-------------------------|---------------------------------|--------------------|------|---------|
| 1     | Me <sub>2</sub> Pz (10) | Cs <sub>2</sub> CO <sub>3</sub> | DMSO               | 60   | 96      |
| 2     | Me <sub>2</sub> Pz (10) | Cs <sub>2</sub> CO <sub>3</sub> | DMSO               | 40   | 13      |
| 3     | Me <sub>2</sub> Pz (10) | Cs <sub>2</sub> CO <sub>3</sub> | DMSO               | 55   | 68      |
| 4     | Me <sub>2</sub> Pz (10) | Cs <sub>2</sub> CO <sub>3</sub> | DMSO               | 70   | >99     |
| 5     | Me <sub>2</sub> Pz (10) | Cs <sub>2</sub> CO <sub>3</sub> | DMSO               | 80   | >99     |
| 6     | -                       | K <sub>2</sub> CO <sub>3</sub>  | DMSO               | 60   | -       |
| 7     | Me <sub>2</sub> Pz (10) | K <sub>2</sub> CO <sub>3</sub>  | DMSO               | 60   | 24      |
| 8     | -                       | CsF                             | DMSO               | 60   | -       |
| 9     | Me <sub>2</sub> Pz (10) | CsF                             | DMSO               | 60   | 42      |
| 10    | Me <sub>2</sub> Pz (10) | KOH                             | DMSO               | 60   | -       |
| 11    | Me <sub>2</sub> Pz (10) | <i>t</i> -KOBu                  | DMSO               | 60   | 5       |
| 12    | Me <sub>2</sub> Pz (10) | DBU                             | DMSO               | 60   | 24      |
| 13    | -                       | DBU                             | DMSO               | 60   | 25      |
| 14    | Me <sub>2</sub> Pz (10) | TBD                             | DMSO               | 60   | 30      |
| 15    | -                       | TBD                             | DMSO               | 60   | 28      |
| 16    | Me <sub>2</sub> Pz (10) | TMP                             | DMSO               | 60   | -       |
| 17    | -                       | Cs <sub>2</sub> CO <sub>3</sub> | DMF                | 60   | -       |
| 18    | Me <sub>2</sub> Pz (10) | Cs <sub>2</sub> CO <sub>3</sub> | DMF                | 60   | 63      |
| 19    | Me <sub>2</sub> Pz (10) | Cs <sub>2</sub> CO <sub>3</sub> | CH <sub>3</sub> CN | 60   | 8       |
| 20    | Me <sub>2</sub> Pz (10) | Cs <sub>2</sub> CO <sub>3</sub> | PC <sup>b</sup>    | 60   | -       |
| 21    | Me <sub>2</sub> Pz (5)  | Cs <sub>2</sub> CO <sub>3</sub> | DMSO               | 60   | 78      |
| 22    | Me <sub>2</sub> Pz (20) | Cs <sub>2</sub> CO <sub>3</sub> | DMSO               | 60   | >99     |

<sup>a</sup> Reaction conditions: **1a** (1.0 mmol), catalyst, base (1.5 mmol, 1.5 eq.), CO<sub>2</sub> (balloon), solvent (3 mL), 6 h; isolated yield. <sup>b</sup> PC: propylene carbonate.

## S4 Comparison of Me<sub>2</sub>Pz with the reported catalysts

Table S3. Carboxylation of **1a** using various metal and organic catalysts at ambient CO<sub>2</sub> pressure. <sup>a</sup>

| Entry                         | Catalyst                                                                      | Base                            | T/°C | t/h | Yield/%           | Ref.             |
|-------------------------------|-------------------------------------------------------------------------------|---------------------------------|------|-----|-------------------|------------------|
| Homogeneous metal catalysts   |                                                                               |                                 |      |     |                   |                  |
| 1                             | Cu(BPhen)(4-F-PPh <sub>3</sub> ) <sub>2</sub> (NO <sub>3</sub> ) <sup>c</sup> | Cs <sub>2</sub> CO <sub>3</sub> | 35   | 16  | 98 <sup>b</sup>   | 1                |
| 2                             | CuCl-TMEDA                                                                    | K <sub>2</sub> CO <sub>3</sub>  | 25   | 16  | 90 <sup>b</sup>   | 2                |
| 3                             | CuI(dtbpf)                                                                    | Cs <sub>2</sub> CO <sub>3</sub> | 25   | 24  | 94 <sup>b</sup>   | 3                |
| 4                             | CuCl- <i>n</i> -Bu <sub>4</sub> NOAc <sup>d</sup>                             | K <sub>2</sub> CO <sub>3</sub>  | rt   | 16  | 90                | 4                |
| 5                             | (NHC) <sub>2</sub> -Ag complex                                                | Cs <sub>2</sub> CO <sub>3</sub> | rt   | 16  | 85                | 5                |
| 6                             | AgBF <sub>4</sub>                                                             | Cs <sub>2</sub> CO <sub>3</sub> | 50   | 16  | 98                | 6                |
| 7                             | Nd-bis(amidate)                                                               | Cs <sub>2</sub> CO <sub>3</sub> | 40   | 24  | 94                | 7                |
| 8                             | NHC-Mo                                                                        | Cs <sub>2</sub> CO <sub>3</sub> | 70   | 18  | 94 <sup>b</sup>   | 8                |
| 9                             | CuI <sup>e</sup>                                                              | Cs <sub>2</sub> CO <sub>3</sub> | 80   | 18  | 96                | 9                |
| Heterogeneous metal catalysts |                                                                               |                                 |      |     |                   |                  |
| 10                            | Ag/Schiff-SiO <sub>2</sub>                                                    | Cs <sub>2</sub> CO <sub>3</sub> | 60   | 24  | 98 <sup>b</sup>   | 10               |
| 11                            | Fe <sub>3</sub> O <sub>4</sub> @Ag-40B                                        | Cs <sub>2</sub> CO <sub>3</sub> | 50   | 15  | 97 <sup>b</sup>   | 11               |
| 12                            | CeO <sub>2</sub> -Ag                                                          | Cs <sub>2</sub> CO <sub>3</sub> | 80   | 12  | 98 <sup>b</sup>   | 12               |
| 13                            | Ag/PCNF-700                                                                   | Cs <sub>2</sub> CO <sub>3</sub> | 25   | 18  | 90                | 13               |
| 14                            | Cu-CN-8.0                                                                     | Cs <sub>2</sub> CO <sub>3</sub> | 80   | 10  | 97 <sup>b</sup>   | 14               |
| 15                            | Ag@MIL-101(Cr)                                                                | Cs <sub>2</sub> CO <sub>3</sub> | 50   | 15  | 96.5 <sup>b</sup> | 15               |
| 16                            | Ag/Co-MOF                                                                     | Cs <sub>2</sub> CO <sub>3</sub> | 80   | 14  | 96 <sup>b</sup>   | 16               |
| 17                            | UiO-66@UiO-67-BPY-Ag                                                          | Cs <sub>2</sub> CO <sub>3</sub> | 50   | 24  | 96 <sup>b</sup>   | 17               |
| 18                            | Au <sub>12</sub> Ag <sub>32</sub> (SR) <sub>30</sub> @ZIF-8                   | K <sub>2</sub> CO <sub>3</sub>  | 50   | 24  | 100               | 18               |
| 19                            | Poly-NHC-Ag                                                                   | Cs <sub>2</sub> CO <sub>3</sub> | rt   | 20  | 98 <sup>b</sup>   | 19               |
| 20                            | Ag-HMP-2                                                                      | Cs <sub>2</sub> CO <sub>3</sub> | 80   | 12  | 98 <sup>b</sup>   | 20               |
| 21                            | AgNPs/MCC                                                                     | Cs <sub>2</sub> CO <sub>3</sub> | 50   | 16  | 99                | 21               |
| 22                            | Ag@FeNT                                                                       | Cs <sub>2</sub> CO <sub>3</sub> | 60   | 15  | 70                | 22               |
| 23                            | CTF-DCE-Ag                                                                    | Cs <sub>2</sub> CO <sub>3</sub> | 50   | 20  | 90.2 <sup>b</sup> | 23               |
| 25                            | Ag@CTFN                                                                       | Cs <sub>2</sub> CO <sub>3</sub> | 60   | 24  | 97                | 24               |
| 26                            | TpBpy-Cu-14                                                                   | Cs <sub>2</sub> CO <sub>3</sub> | 60   | 24  | 95                | 25               |
| 27                            | NHC-AuCl-COF                                                                  | Cs <sub>2</sub> CO <sub>3</sub> | 50   | 16  | 96                | 26               |
| Organocatalysts               |                                                                               |                                 |      |     |                   |                  |
| 28                            | PAPBI                                                                         | Cs <sub>2</sub> CO <sub>3</sub> | 60   | 24  | 94                | 27               |
| 29                            | TpBpy                                                                         | Cs <sub>2</sub> CO <sub>3</sub> | 60   | 6   | 67                | 28               |
| 30                            | TG-DMPZ                                                                       | Cs <sub>2</sub> CO <sub>3</sub> | 80   | 10  | 95                | 29               |
| 31                            | TG(PZ) <sub>3</sub>                                                           | Cs <sub>2</sub> CO <sub>3</sub> | 80   | 10  | 90                | 29               |
| 32                            | Pz                                                                            | Cs <sub>2</sub> CO <sub>3</sub> | 60   | 6   | 85                | <i>This work</i> |
| 33                            | Me <sub>2</sub> Pz                                                            | Cs <sub>2</sub> CO <sub>3</sub> | 60   | 6   | 96                | <i>This work</i> |

<sup>a</sup> The solvent is DMSO unless otherwise specified. For a more complete collection, see ref. 30. <sup>b</sup> The solvent is DMF. <sup>c</sup> The CO<sub>2</sub> pressure is 5 atm. <sup>d</sup> *n*-Bu<sub>4</sub>NOAc (1.5 mmol, 1.5 eq.), the solvent is MeCN. <sup>e</sup> The reaction performs ethylene carbonate (EC) as the solvent in the presence of *n*-butyl iodide.

## S5 Mechanism exploration

### S5.1 Interactions between azoles and Cs<sub>2</sub>CO<sub>3</sub>

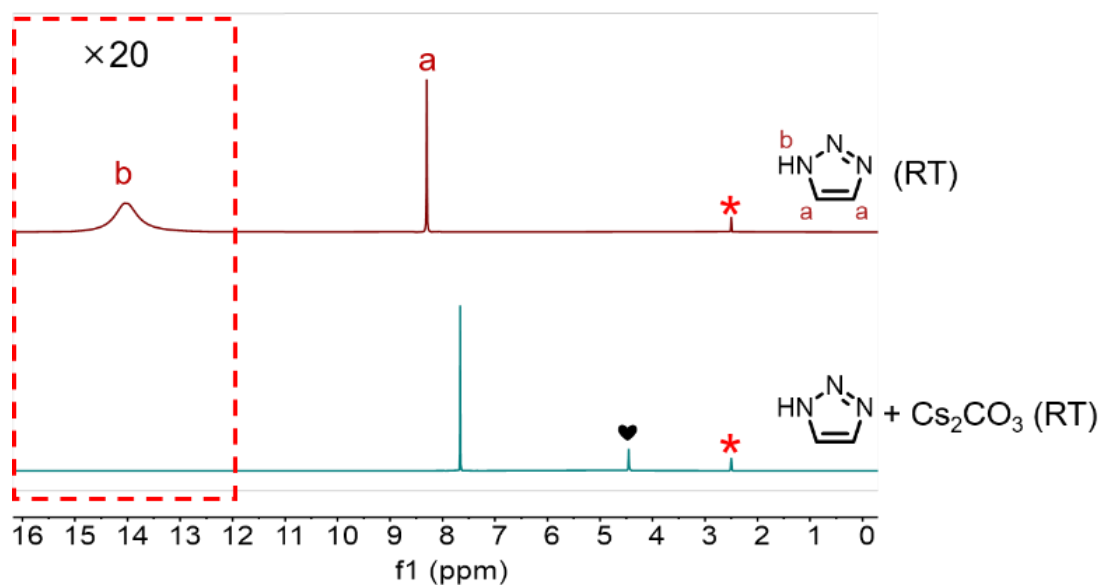

Fig. S1. <sup>1</sup>H NMR spectra of 1,2,3-triazole with/without Cs<sub>2</sub>CO<sub>3</sub> in DMSO-*d*<sub>6</sub> at room temperature (\*: DMSO-*d*<sub>6</sub>; ♥: H<sub>2</sub>O). The red dashed box shows the magnification in the 16 - 12 ppm range.

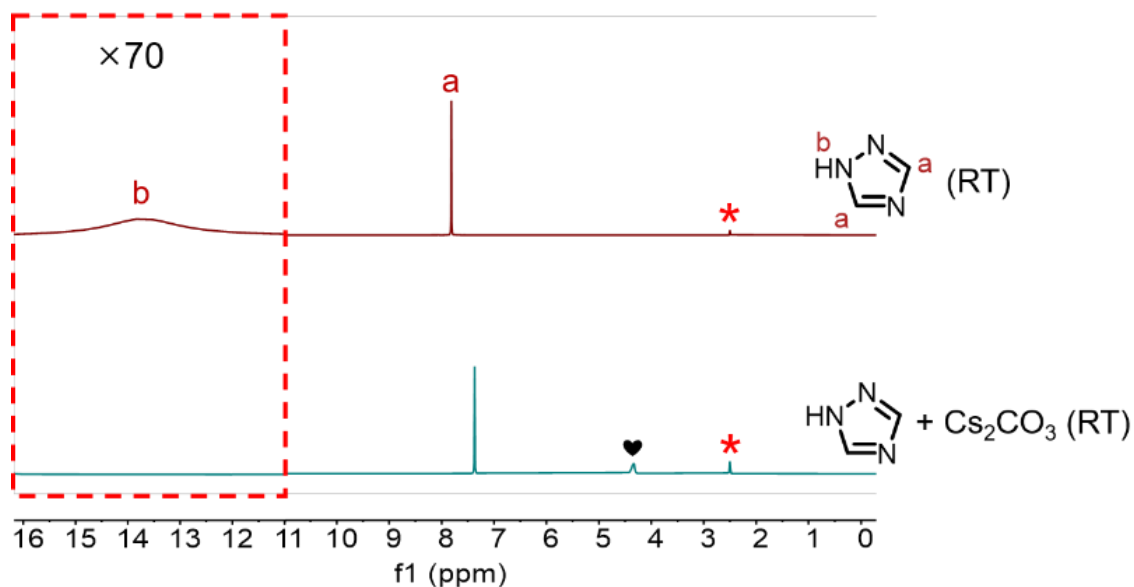

Fig. S2. <sup>1</sup>H NMR spectra of 1,2,4-triazole with/without Cs<sub>2</sub>CO<sub>3</sub> in DMSO-*d*<sub>6</sub> at room temperature (\*: DMSO-*d*<sub>6</sub>; ♥: H<sub>2</sub>O). The red dashed box shows the magnification in the 16 - 11 ppm range.

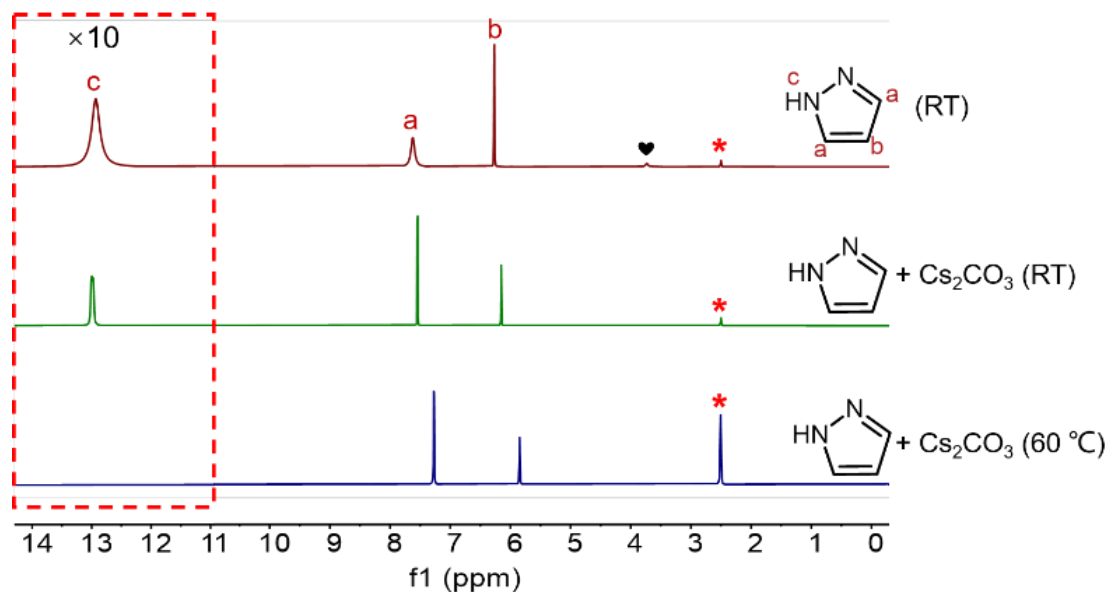

Fig. S3.  $^1\text{H}$  NMR spectra of pyrazole (Pz) with/without  $\text{Cs}_2\text{CO}_3$  in  $\text{DMSO}-d_6$  at RT or  $60\text{ }^\circ\text{C}$  (\*:  $\text{DMSO}-d_6$ ; ♥:  $\text{H}_2\text{O}$ ). The red dashed box shows the magnification in the 14 - 11 ppm range.

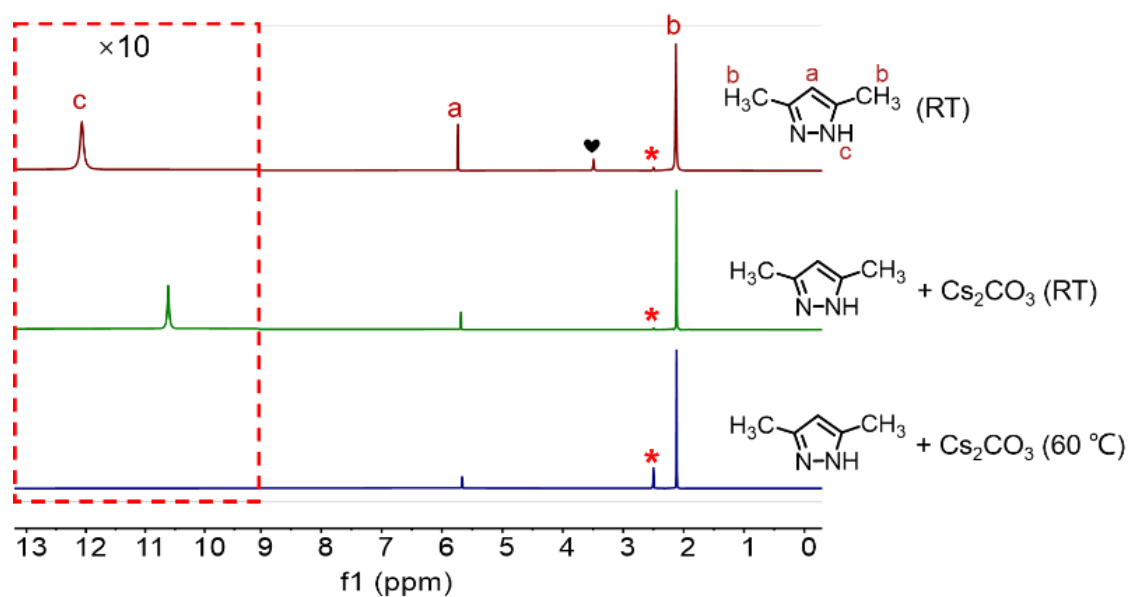

Fig. S4.  $^1\text{H}$  NMR spectra of 3,5-dimethylpyrazole ( $\text{Me}_2\text{Pz}$ ) with/without  $\text{Cs}_2\text{CO}_3$  in  $\text{DMSO}-d_6$  at RT or  $60\text{ }^\circ\text{C}$  (\*:  $\text{DMSO}-d_6$ ; ♥:  $\text{H}_2\text{O}$ ). The red dashed box shows the magnification in the 13 - 9 ppm range.

## S5.2 Formation of the Pz-CO<sub>2</sub> adduct

**Cs(PzCO<sub>2</sub>).** A mixture of Pz (10 mmol) and Cs<sub>2</sub>CO<sub>3</sub> (1.5 eq.) in anhydrous DMSO was placed in a sealed round bottom flask. The resulting mixture was stirred for 2 h at 60 °C and then filtered. The filtrate, which contains CsPz, was stirred under CO<sub>2</sub> or <sup>13</sup>CO<sub>2</sub> (balloon) for another 2 h. The solutions before and after reacting with CO<sub>2</sub> were tested by <sup>1</sup>H NMR and <sup>13</sup>C NMR.

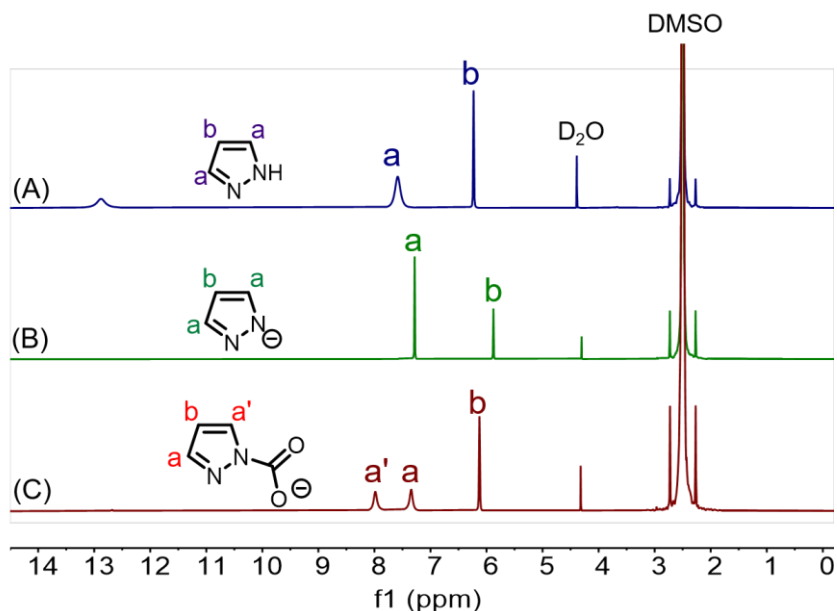

Fig. S5. <sup>1</sup>H NMR spectra (300 MHz, DMSO, 298 K, locked to a D<sub>2</sub>O capillary) of Pz (A), CsPz (B) and Cs(PzCO<sub>2</sub>) (C).

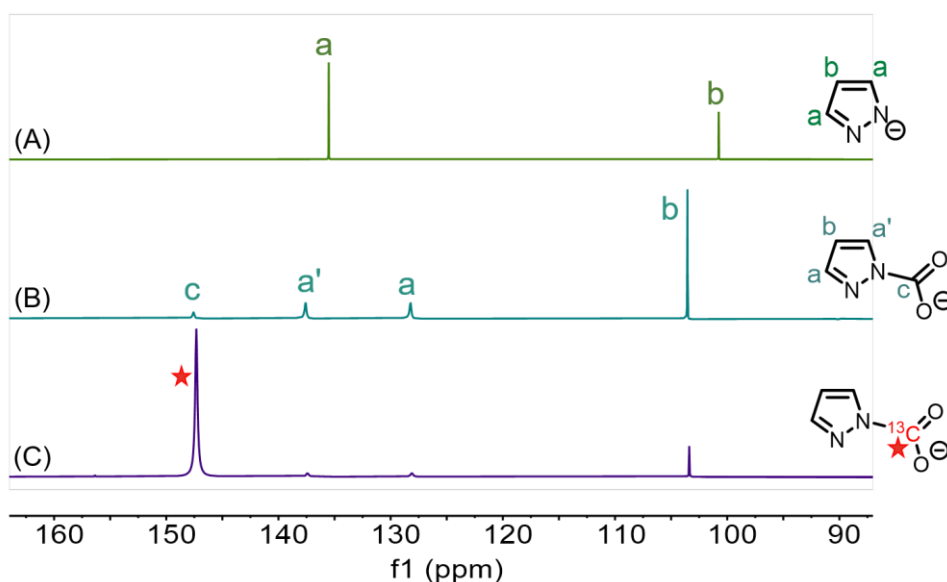

Fig. S6. <sup>13</sup>C NMR spectra (400 MHz, DMSO, 298 K, locked to a D<sub>2</sub>O capillary) of CsPz (A, 1024 scans), Cs(PzCO<sub>2</sub>) (B, 1024 scans) and Cs(Pz<sup>13</sup>CO<sub>2</sub>) (C, 8 scans).

### S5.3 Carboxylation of **1a** with Cs(Pz<sup>13</sup>CO<sub>2</sub>)

**Synthetic procedure:** The reactor with or without Cs<sub>2</sub>CO<sub>3</sub> was equipped with a N<sub>2</sub>/CO<sub>2</sub> balloon and heated in an oil bath. Then **1a** (1.0 mmol) and Cs(Pz<sup>13</sup>CO<sub>2</sub>) (1 mmol in 3 mL DMSO) were injected under stirring to start the reaction. After stirring at 60 °C for 6 h, the reaction was quenched with water (15 mL). The resultant solution was washed with CH<sub>2</sub>Cl<sub>2</sub>, acidified with 1 M HCl to pH = 1 and then extracted with ethyl acetate (15 mL × 3). The combined organic phase was washed with saturated NaCl solution and dried over anhydrous MgSO<sub>4</sub>. The solvent was removed under vacuum to obtain product, which was weighed for yield calculations.

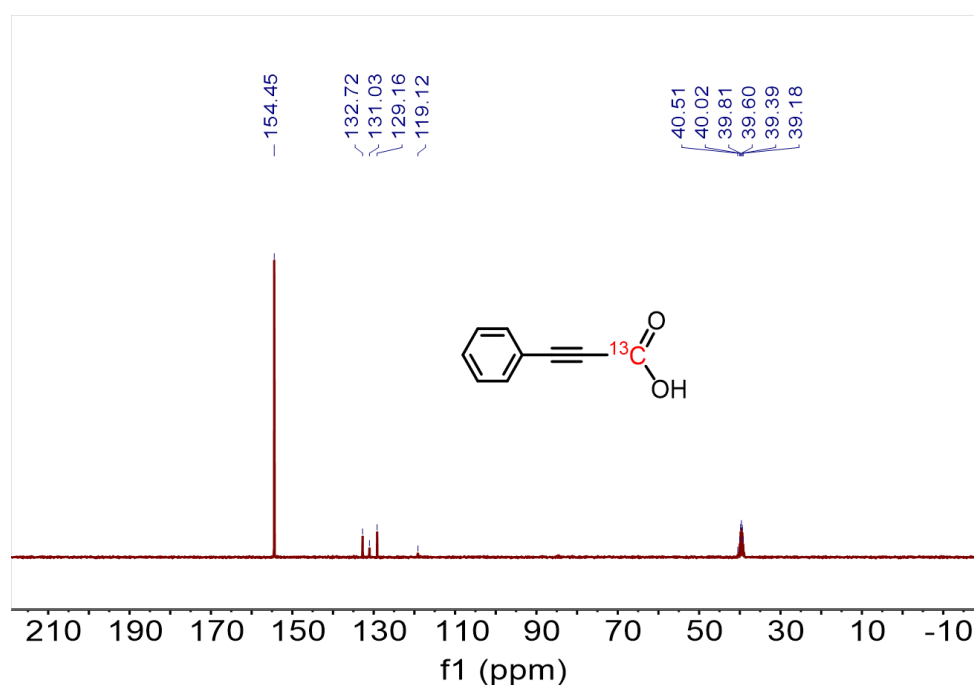

Fig. S7. <sup>13</sup>C NMR spectra (400 MHz, DMSO-*d*<sub>6</sub>) of <sup>13</sup>C<sub>carboxyl</sub>-labeled **2a** with 8 scans.

#### S5.4 Interaction between **1a** and Cs<sub>2</sub>CO<sub>3</sub>

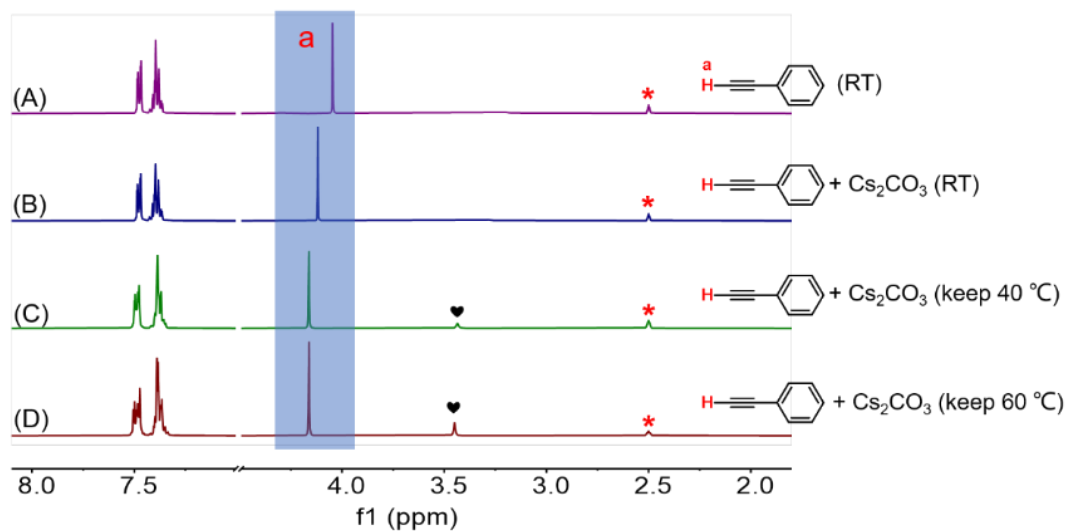

Fig. S8. <sup>1</sup>H NMR spectra of **1a** (A), **1a** with Cs<sub>2</sub>CO<sub>3</sub> (B) and variable-temperature NMR spectra of **1a** with Cs<sub>2</sub>CO<sub>3</sub> at 40 °C (C) and at 60 °C (D) in DMSO-d<sub>6</sub> (\*: DMSO-d<sub>6</sub>; ♥: H<sub>2</sub>O).

#### S5.5 Interaction between **1a** and Cs(PzCO<sub>2</sub>)

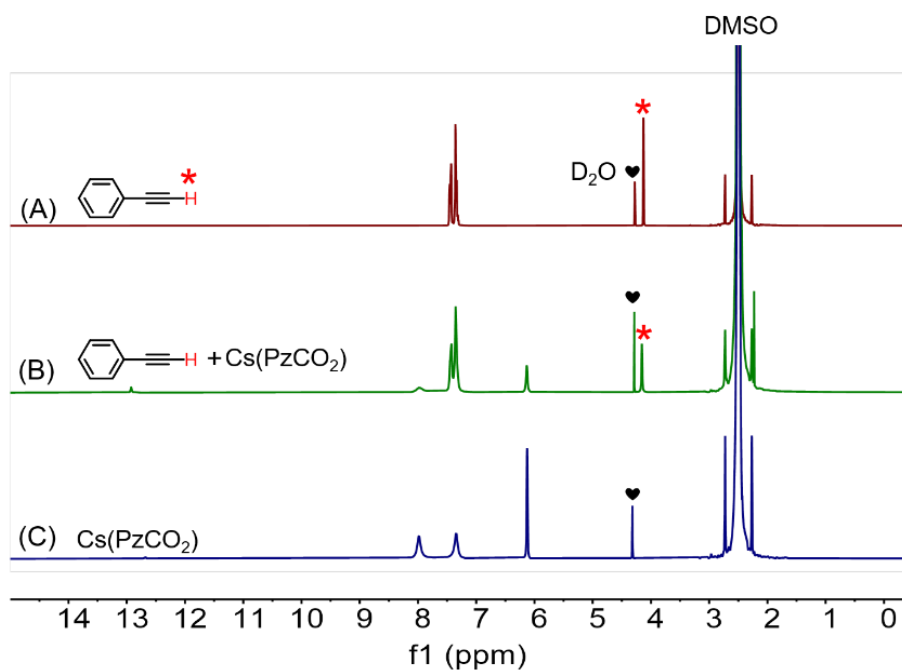

Fig. S9. <sup>1</sup>H NMR spectra (300 MHz, DMSO, 298 K, locked to a D<sub>2</sub>O capillary) of **1a** (A), **1a** with Cs(PzCO<sub>2</sub>) (B) and Cs(PzCO<sub>2</sub>) (C).

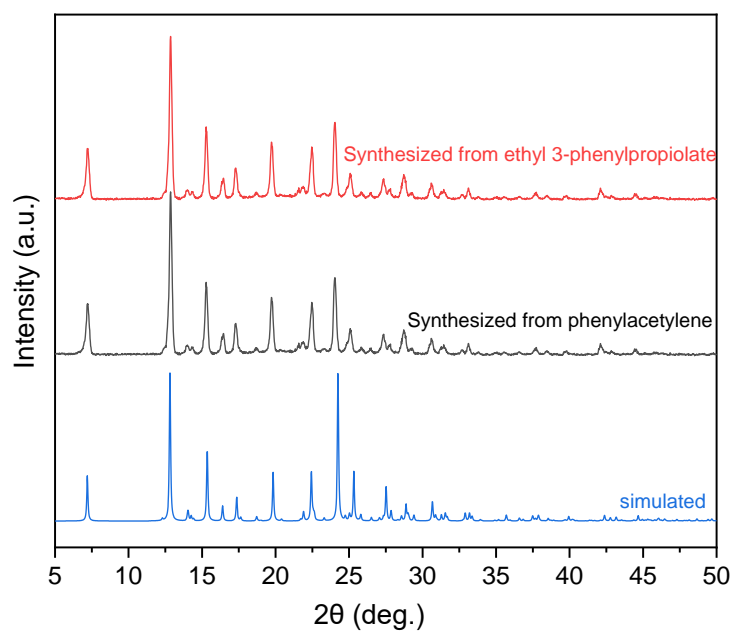

Fig S10. Experimental and simulated XRD patterns of **4d**.

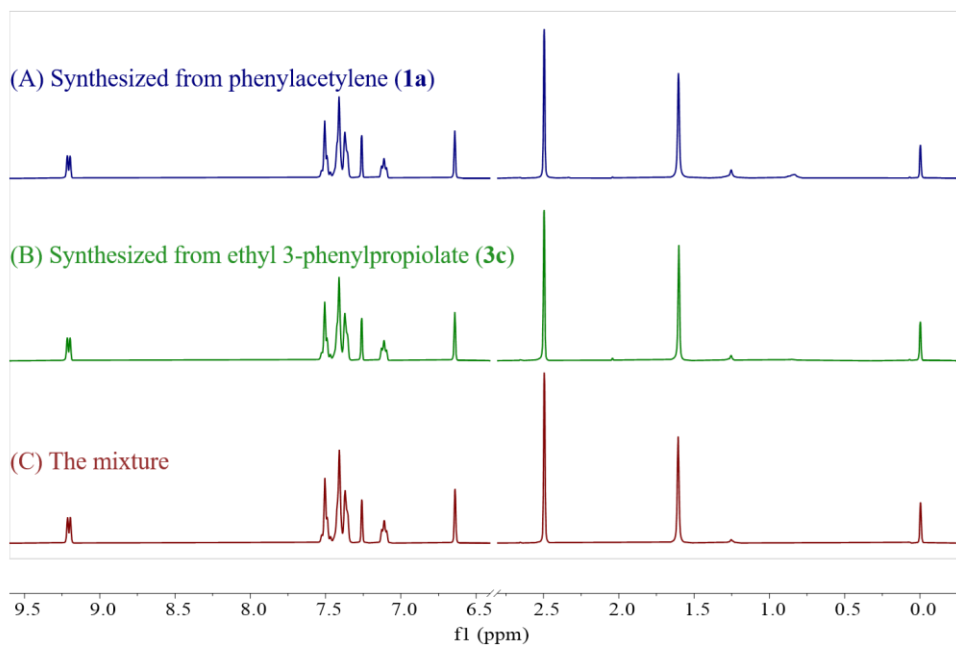

Fig S11.  $^1\text{H}$  NMR spectrum of **4d** synthesized from **1a** (A) or **3c** (B), the products obtained by these two methods are mixed for (C).

## S6 Synthesis and characterization for propiolic acids (2)

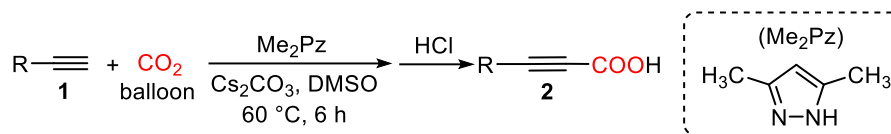

**General synthetic procedure:** The catalyst (Me<sub>2</sub>Pz, 10 mol%) and Cs<sub>2</sub>CO<sub>3</sub> (1.5 mmol) were added to a Schlenk tube. After three times of atmosphere exchange with CO<sub>2</sub>, the reactor was equipped with a CO<sub>2</sub> balloon and heated to 60 °C in an oil bath. Then 1.0 mmol terminal alkyne dissolved in 3 mL dry DMSO was injected under stirring to start the reaction. After stirring at 60 °C for 6 h, the reaction was quenched with water (15 mL). The resultant solution was washed with CH<sub>2</sub>Cl<sub>2</sub>, acidified with 1 M HCl to pH = 1 and then extracted with ethyl acetate (15 mL × 3). The combined organic phase was washed with saturated NaCl solution and dried over anhydrous MgSO<sub>4</sub>. The solvent was removed under vacuum to obtain the propiolic acid, which was weighed for yield calculations.

### Characterization data

#### 3-Phenylpropionic acid (2a)

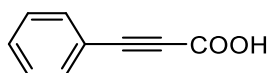

White solid; 140.3 mg, yield: 96%

<sup>1</sup>H NMR (400 MHz, DMSO-*d*<sub>6</sub>) δ 13.58 (s, 1H), 7.64 - 7.61 (m, 2H), 7.57 - 7.52 (m, 1H), 7.49 - 7.45 (m, 2H).

#### 4-Methoxyphenylpropionic acid (2b)

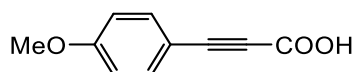

Yellow solid; 134 mg, yield: 76%

<sup>1</sup>H NMR (500 MHz, DMSO-*d*<sub>6</sub>) δ 13.59 (s, 1H), 7.59 (d, *J* = 7.8 Hz, 2H), 7.03 (d, *J* = 7.8 Hz, 2H), 3.80 (s, 3H).

#### 4-Methylphenylpropionic acid (2c)

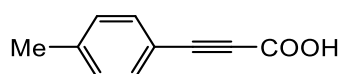

White solid; 128.4 mg, yield: 80%

<sup>1</sup>H NMR (500 MHz, DMSO-*d*<sub>6</sub>) δ 7.49 (d, *J* = 8.1 Hz, 2H), 7.26 (d, *J* = 8.1 Hz, 2H), 2.33 (s, 3H).

4-Pentylphenylpropionic acid (**2d**)

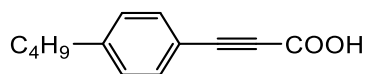

White solid; 121.4 mg, yield: 60%

$^1\text{H}$  NMR (300 MHz, DMSO- $d_6$ )  $\delta$  7.55 (d,  $J$  = 7.4 Hz, 2H), 7.49 (d,  $J$  = 8.0 Hz, 2H), 1.28 (s, 9H).

3-(Biphenyl-4-yl)propionic acid (**2e**)

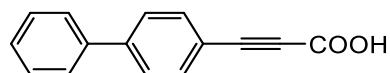

Yellow solid; 210.5 mg, yield: 95%

$^1\text{H}$  NMR (500 MHz, DMSO- $d_6$ )  $\delta$  7.77 (d,  $J$  = 8.0 Hz, 2H), 7.72 - 7.69 (m, 4H), 7.49 (t,  $J$  = 7.5 Hz, 2H), 7.41 (t,  $J$  = 7.3 Hz, 1H).

4-Chlorophenylpropionic acid (**2f**)

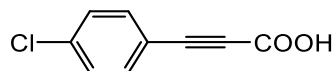

Yellow solid; 173 mg, yield: 96%

$^1\text{H}$  NMR (500 MHz, DMSO- $d_6$ )  $\delta$  7.63 (d,  $J$  = 8.5 Hz, 2H), 7.52 (d,  $J$  = 8.5 Hz, 2H).

4-Trifluoromethylphenylpropionic acid (**2g**)

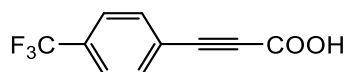

White solid; 211.5 mg, yield: 99%

$^1\text{H}$  NMR (500 MHz, DMSO- $d_6$ )  $\delta$  7.85 (d,  $J$  = 8.5 Hz, 2H), 7.82 (d,  $J$  = 8.5 Hz, 2H).

4-Formylphenylpropionic acid (**2h**)

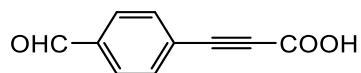

White solid; 169 mg, yield: 97%

$^1\text{H}$  NMR (300 MHz, DMSO- $d_6$ )  $\delta$  13.36 (br), 10.06 (s, 1H), 7.98 (d,  $J$  = 8.2 Hz, 2H), 7.82 (d,  $J$  = 8.2 Hz, 2H).

4-Cyanophenylpropionic acid (**2i**)

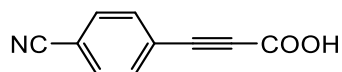

White solid; 167.8 mg, yield: 98%

$^1\text{H}$  NMR (400 MHz, DMSO- $d_6$ )  $\delta$  7.91 (d,  $J$  = 8.0 Hz, 2H), 7.79 (d,  $J$  = 8.0 Hz, 2H).

4-Nitrophenylpropionic acid (**2j**)

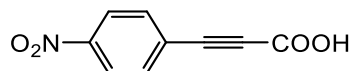

Yellow solid; 189 mg, yield: 99%

$^1\text{H}$  NMR (500 MHz, DMSO- $d_6$ )  $\delta$  8.29 (d,  $J$  = 7.7 Hz, 2H), 7.91 (d,  $J$  = 7.8 Hz, 2H).

3-(Thiophen-3-yl)propionic acid (**2k**)

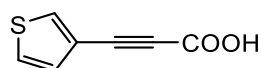

White solid; 150 mg, yield: 99%

$^1\text{H}$  NMR (500 MHz, DMSO- $d_6$ )  $\delta$  7.89 (dd,  $J$  = 5.1, 1.2 Hz, 1H), 7.67 (dd,  $J$  = 3.7, 1.2 Hz, 1H), 7.20 (dd,  $J$  = 5.1, 3.7 Hz, 1H).

(Pyridin-2-yl)propynoic acid (**2l**)

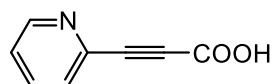

Dark red solid; 73 mg, yield: 50%

$^1\text{H}$  NMR (500 MHz, DMSO- $d_6$ )  $\delta$  8.65 (dt,  $J$  = 4.8, 1.4 Hz, 1H), 7.90 (td,  $J$  = 7.7, 1.8 Hz, 1H), 7.73 (dt,  $J$  = 7.9, 1.2 Hz, 1H), 7.52 (ddd,  $J$  = 7.7, 1.2 Hz, 1H).

4-Amino-2-butynoic acid (**2m**)

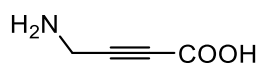

Colorless oil; 66 mg, yield: 67%

$^1\text{H}$  NMR (300 MHz, DMSO- $d_6$ )  $\delta$  3.79 (s, 2H).

4-Bromo-2-butynoic acid (**2n**)

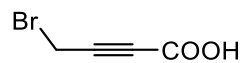

Brown oil; 113 mg, yield: 70%

$^1\text{H}$  NMR (300 MHz, DMSO- $d_6$ )  $\delta$  4.23 (s, 2H).

3,3'-(1,4-Phenylene)dipropiolic acid (**2q**)

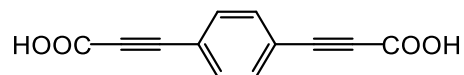

White solid; 197 mg, yield: 92%

$^1\text{H}$  NMR (300 MHz, DMSO- $d_6$ )  $\delta$  13.85 (br), 7.70 (s, 4H).

3,3',3''-(1,3,5-Phenylene)tripropiolic acid (**2r**)

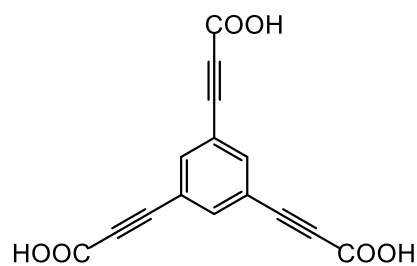

Yellow solid; 279 mg, yield: 99%

$^1\text{H}$  NMR (300 MHz, DMSO- $d_6$ )  $\delta$  7.96 (s, 3H).

## S7 Synthesis and characterization for propiolic acid esters (3)

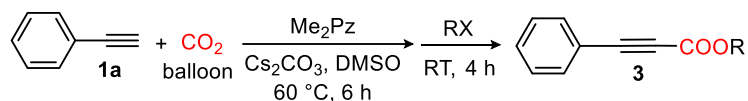

**General synthetic procedure:** The catalyst (Me<sub>2</sub>Pz, 10 mol%) and Cs<sub>2</sub>CO<sub>3</sub> (1.5 mmol) were added to a Schlenk tube. After three times of atmosphere exchange with CO<sub>2</sub>, the reactor was equipped with a CO<sub>2</sub> balloon and heated to 60 °C in an oil bath. Then **1a** (1.0 mmol) dissolved in 3 mL dry DMSO was injected under stirring to start the reaction. After stirring at 60 °C for 6 h and cooling to room temperature, RX (1.2 eq.) was added and stirred for another 4 h. The reaction was quenched with water (15 mL) and the resultant solution was extracted with ethyl acetate (15 mL × 3). The combined organic phase was washed with saturated NaCl solution, dried over anhydrous MgSO<sub>4</sub> and the solvent was removed in vacuo. The crude product was purified by flash column chromatography.

### Characterization data

#### Methyl 3-phenylpropiolate (**3a**)

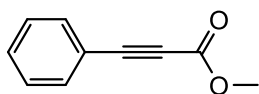

Colorless oil; 155.4 mg, yield: 97%

<sup>1</sup>H NMR (300 MHz, DMSO-*d*<sub>6</sub>) δ 7.69 - 7.66 (m, 2H), 7.62 - 7.56 (m, 1H), 7.53 - 7.47 (m, 2H), 3.79 (s, 3H).

#### Butyl 3-phenyl-2-propynoate (**3b**)

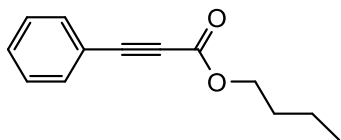

Colorless oil; 186 mg, yield: 92%

<sup>1</sup>H NMR (300 MHz, Chloroform-*d*) δ 7.57 - 7.54 (m, 2H), 7.44 - 7.38 (m, 1H), 7.36 - 7.31 (m, 2H), 4.21 (t, *J* = 6.7 Hz, 2H), 1.70 - 1.60 (m, 2H), 1.45 - 1.36 (m, 2H), 0.94 (t, *J* = 7.4 Hz, 3H).

Ethyl 3-phenylpropiolate (**3c**)

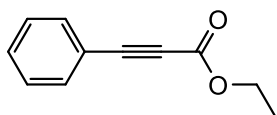

Colorless oil; 163.5 mg, yield: 94%

$^1\text{H}$  NMR (300 MHz, Chloroform-*d*)  $\delta$  7.60 - 7.57 (m, 2H), 7.48 - 7.42 (m, 1H), 7.40 - 7.34 (m, 2H), 4.30 (q,  $J$  = 7.1 Hz, 2H), 1.36 (t,  $J$  = 7.2 Hz, 3H).

2-Oxo-2-phenylethyl 3-phenylpropiolate (**3d**)

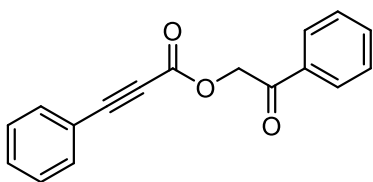

Pale yellow solid; 250 mg, yield: 95%

$^1\text{H}$  NMR (300 MHz, Chloroform-*d*)  $\delta$  7.94 (d,  $J$  = 7.1 Hz, 2H), 7.63 (dd,  $J$  = 6.9, 1.8 Hz, 3H), 7.54 - 7.45 (m, 3H), 7.39 (t,  $J$  = 7.3 Hz, 2H), 5.50 (s, 2H).

Cinnamyl 3-phenylpropiolate (**3e**)

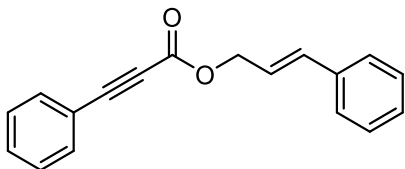

Colourless oil; 207 mg, yield: 79%

$^1\text{H}$  NMR (300 MHz, Chloroform-*d*)  $\delta$  7.62 - 7.59 (m, 2H), 7.49 - 7.28 (m, 8H), 6.73 (d,  $J$  = 15.9 Hz, 1H), 6.35 (dt,  $J$  = 15.9, 6.6 Hz, 1H), 4.90 (dd,  $J$  = 6.6, 1.3 Hz, 2H).

## S8 Synthesis and characterization for 4H-quinazolin-4-ones (4)

**General synthetic procedure:** The catalyst ( $\text{Me}_2\text{Pz}$ , 10 mol%) and  $\text{Cs}_2\text{CO}_3$  (1.5 mmol) were added to a Schlenk tube. After three times of atmosphere exchange with  $\text{CO}_2$ , the reactor was equipped with a  $\text{CO}_2$  balloon and heated to 60 °C in an oil bath. Then **1a** (1.0 mmol) dissolved in 3 mL dry DMSO was injected under stirring to start the reaction. After stirring at 60 °C for 6 h and cooling to room temperature, EtBr (1.2 eq.) and pyridine derivatives (2.0 eq.) were added and heated at 100 °C for another 8 h. The reaction was quenched with water (15 mL) and the resultant solution was extracted with ethyl acetate (15 mL  $\times$  3). The combined organic phase was washed with saturated NaCl solution, dried over anhydrous  $\text{MgSO}_4$  and the solvent was removed in vacuo. The crude product was purified by flash column chromatography.

### Characterization data

#### 4-Oxo-2-phenyl-4H-quinolizine-1-carbonitrile (**4a**)

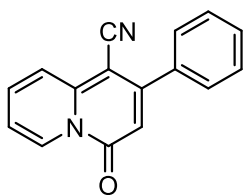

Yellow solid; 218 mg, yield: 89%

$^1\text{H}$  NMR (300 MHz, Chloroform-*d*)  $\delta$  9.28 (d,  $J = 7.0$  Hz, 1H), 8.15 (d,  $J = 9.0$  Hz, 1H), 7.81 - 7.75 (m, 1H), 7.66 - 7.63 (m, 2H), 7.53 (dd,  $J = 4.3, 2.4$  Hz, 3H), 7.29 - 7.24 (m, 1H), 6.63 (s, 1H).

#### 2-(3-Chlorophenyl)-4-oxo-4H-quinolizine-1-carbonitrile (**4b**)

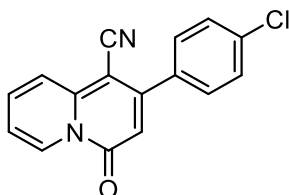

Yellow solid; 257 mg, yield: 92%

$^1\text{H}$  NMR (300 MHz, Chloroform-*d*)  $\delta$  9.28 (d,  $J = 7.2$  Hz, 1H), 8.13 (d,  $J = 8.9$  Hz, 1H), 7.83 - 7.77 (m, 1H), 7.61 - 7.56 (m, 2H), 7.53 - 7.48 (m, 2H), 7.31 - 7.28 (m, 1H), 6.58 (s, 1H).

Ethyl 4-oxo-2-phenyl-4H-quinolizine-1-carboxylate (**4c**)

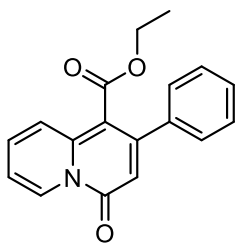

Yellow solid; 220 mg, yield: 75%

$^1\text{H}$  NMR (400 MHz, Chloroform-*d*)  $\delta$  9.25 (d,  $J = 7.4$  Hz, 1H), 8.22 (d,  $J = 9.2$  Hz, 1H), 7.58 - 7.52 (m, 1H), 7.45 - 7.36 (m, 5H), 7.15 - 7.10 (m, 1H), 6.59 (s, 1H), 3.96 (q,  $J = 7.1$  Hz, 2H), 0.79 (t,  $J = 7.1$  Hz, 3H).

3-Acetyl-2-phenyl-4H-quinolizin-4-one (**4d**)

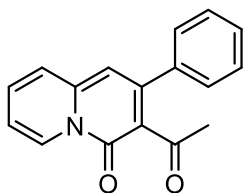

Yellow solid; 238 mg, yield: 90%

$^1\text{H}$  NMR (300 MHz, Chloroform-*d*)  $\delta$  9.21 (d,  $J = 8.4$  Hz, 1H), 7.54 - 7.49 (m, 2H), 7.43 - 7.35 (m, 5H), 7.12 (ddd,  $J = 7.4, 5.5, 2.5$  Hz, 1H), 6.64 (s, 1H), 2.50 (s, 3H).

## S9 Synthesis and characterization for 2H-pyran-2-one (5)

**General synthetic procedure:** The catalyst (Me<sub>2</sub>Pz, 10 mol%) and Cs<sub>2</sub>CO<sub>3</sub> (1.5 mmol) were added to a Schlenk tube. After three times of atmosphere exchange with CO<sub>2</sub>, the reactor was equipped with a CO<sub>2</sub> balloon and heated to 60 °C in an oil bath. Then **1a** (1.0 mmol) dissolved in 3 mL dry DMSO was injected under stirring to start the reaction. After stirring at 60 °C for 6 h and cooling to room temperature, EtBr (1.2 eq.) was added and stirred at RT for 4 h. Then, 1,3-dicarbonyl compound (1.0 eq.) was added at 100 °C and allowed to react for 4 h. The reaction was quenched with water (15 mL) and the resultant solution was extracted with ethyl acetate (15 mL × 3). The combined organic phase was washed with saturated NaCl solution, dried over anhydrous MgSO<sub>4</sub> and the solvent was removed in vacuo. The crude product was purified by flash column chromatography.

### Characterization data

Ethyl 6-methyl-2-oxo-4-phenyl-2H-pyran-5-carboxylate (**5a**)

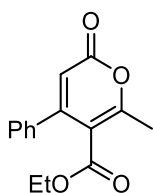

Pale yellow solid; 116 mg, yield: 45%

<sup>1</sup>H NMR (400 MHz, Chloroform-*d*) δ 7.42 - 7.40 (m, 3H), 7.28 (dt, *J* = 7.6, 1.9 Hz, 2H), 6.15 (s, 1H), 3.97 (q, *J* = 7.2 Hz, 2H), 2.45 (s, 3H), 0.86 (t, *J* = 6.4 Hz, 3H).

5-Acetyl-6-methyl-4-phenyl-2H-pyran-2-one (**5b**)

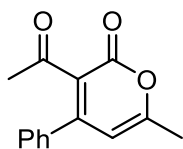

White solid; 86.8 mg, yield: 38%

<sup>1</sup>H NMR (400 MHz, Chloroform-*d*) δ 7.43 (d, *J* = 6.3 Hz, 3H), 7.32 - 7.29 (m, 2H), 6.12 (s, 1H), 2.33 (s, 3H), 2.31 (s, 3H).

5-Benzoyl-4,6-diphenyl-2H-pyran-2-one (**5c**)

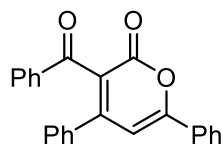

Yellow solid; 263 mg, yield: 75%

$^1\text{H}$  NMR (300 MHz, Chloroform-*d*)  $\delta$  7.96 - 7.91 (m, 2H), 7.88 - 7.85 (m, 2H), 7.53 - 7.46 (m, 4H), 7.41 - 7.35 (m, 4H), 7.34 - 7.30 (m, 3H), 6.89 (s, 1H).

## S10 Synthesis and characterization for 3-cyano-6-hydroxy-2-pyridones (6)

**General synthetic procedure:** The catalyst ( $\text{Me}_2\text{Pz}$ , 10 mol%) and  $\text{Cs}_2\text{CO}_3$  (1.5 mmol) were added to a Schlenk tube. After three times of atmosphere exchange with  $\text{CO}_2$ , the reactor was equipped with a  $\text{CO}_2$  balloon and heated to 60 °C in an oil bath. Then **1a** (1.0 mmol) dissolved in 3 mL dry DMSO was injected under stirring to start the reaction. After stirring at 60 °C for 6 h and cooling to room temperature,  $\text{CH}_3\text{I}$  (1.2 eq.) was added and stirred at RT for 4 h. Then, cyanoacetamide or 2-cyano-*N*-methyl-acetamide (1.02 eq.) was added and heated to 100 °C for 12 h. The reaction was quenched with water (15 mL) and the resultant solution was acidified with 1M HCl to produce solid. The solid was filtered and dried in vacuum.

### Characterization data

6-Hydroxy-2-oxo-4-phenyl-1,2-dihydropyridine-3-carbonitrile (**6a**)

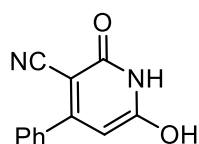

White solid; 159.7 mg, yield: 75%

$^1\text{H}$  NMR (300 MHz,  $\text{DMSO}-d_6$ )  $\delta$  7.51 (s, 5H), 5.65 (s, 1H).

MS:  $[\text{M}+\text{H}]^+$ ; 213.21, found: 213.2

6-Hydroxy-1-methyl-2-oxo-4-phenyl-1,2-dihydropyridine-3-carbonitrile (**6b**)

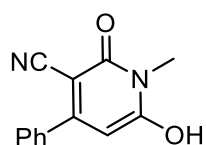

White solid; 162.5 mg, yield: 72%

$^1\text{H}$  NMR (300 MHz,  $\text{DMSO}-d_6$ )  $\delta$  7.51 - 7.50 (m, 5H), 5.63 (s, 1H), 3.31 (s, 3H).

MS:  $[\text{M}+\text{H}]^+$ ; 227.24, found: 227.2

### S11 Synthesis and characterization for 3a-hydroxyisoxazolo[3,2-a]isoindol-8(3aH)-ones (7)

**General synthetic procedure:** The catalyst ( $\text{Me}_2\text{Pz}$ , 10 mol%) and  $\text{Cs}_2\text{CO}_3$  (1.5 mmol) were added to a Schlenk tube. After three times of atmosphere exchange with  $\text{CO}_2$ , the reactor was equipped with a  $\text{CO}_2$  balloon and heated to 60 °C in an oil bath. Then **1a** or **1o** (1.0 mmol) dissolved in 3 mL dry DMSO was injected under stirring to start the reaction. After stirring at 60 °C for 6 h and cooling to room temperature, EtBr (1.2 eq.), NHPI (1.0 eq.) and  $\text{PPh}_3$  (0.1 eq.) were added. The reaction system soon became reddish brown and was stirred at RT for 6 h. The reaction was quenched with water (15 mL) and the resultant solution was extracted with ethyl acetate (15 mL  $\times$  3). The combined organic phase was washed with saturated NaCl solution, dried over anhydrous  $\text{MgSO}_4$  and the solvent was removed in vacuo. The crude product was purified by flash column chromatography.

#### Characterization data

Ethyl 3a-hydroxy-8-oxo-2-phenyl-3a,8-dihydroisoxazolo[3,2-a]-isoindole-3-carboxylate (**7a**)

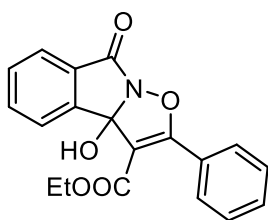

White solid; 327 mg, yield: 97%

$^1\text{H}$  NMR (300 MHz,  $\text{DMSO}-d_6$ )  $\delta$  8.01 (d,  $J = 7.7$  Hz, 1H), 7.98 (s, 1H), 7.90 - 7.83 (m, 2H), 7.72 - 7.63 (m, 3H), 7.61 - 7.48 (m, 3H), 4.11 - 4.00 (m, 2H), 1.10 (t,  $J = 7.1$  Hz, 3H).

Diethyl 2,2'-(1,4-phenylene)bis(3a-hydroxy-8-oxo-3a,8-dihydroisoxazolo[3,2-a]isoindole-3-carboxylate) (**7b**)

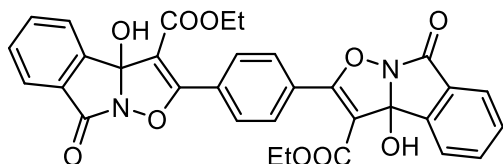

Pale yellow solid; 378 mg, yield: 69%

$^1\text{H}$  NMR (300 MHz,  $\text{DMSO}-d_6$ )  $\delta$  8.00 (d,  $J = 6.8$  Hz, 4H), 7.92 - 7.83 (m, 8H), 7.68 (t,  $J = 8.0$  Hz, 2H), 4.13 - 4.08 (m, 4H), 1.15 - 1.10 (m, 6H).

Ethyl 2-(4-ethynylphenyl)-3a-hydroxy-8-oxo-3a,8-dihydro-isoxazolo[3,2-a]isoindole-3-carboxylate  
(7b')

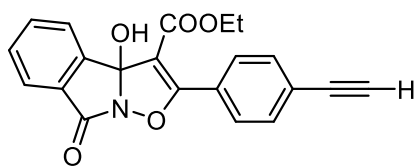

White solid; 72 mg, yield: 22%

$^1\text{H}$  NMR (300 MHz, DMSO- $d_6$ )  $\delta$  8.01 - 7.96 (m, 2H), 7.90 - 7.83 (m, 2H), 7.73 - 7.61 (m, 5H), 4.43 (s, 1H), 4.12 - 4.07 (m, 2H), 1.13 (t,  $J = 7.1$  Hz, 3H).

## S12 Synthesis and characterization for imidazole-4-carboxylic derivatives (9)

**General synthetic procedure:** The catalyst ( $\text{Me}_2\text{Pz}$ , 10 mol%) and  $\text{Cs}_2\text{CO}_3$  (1.5 mmol) were added to a Schlenk tube. After three times of atmosphere exchange with  $\text{CO}_2$ , the reactor was equipped with a  $\text{CO}_2$  balloon and heated to 60 °C in an oil bath. Then **1a** (1.0 mmol) dissolved in 3 mL dry DMSO was injected under stirring to start the reaction. After stirring at 60 °C for 6 h and cooling to room temperature, EtBr (1.2 eq.) was added and stirred for 4 h. Benzylamine (1.2 eq.) and  $\text{Cs}_2\text{CO}_3$  (1.0 mmol) were addition to form intermediate products (**8**). KI (0.3 eq.) and  $t\text{BuONO}$  (2.0 eq.) were added and the reaction mixture was stirred at 80 °C for 18 h. The reaction was quenched with water (15 mL) and the resultant solution was extracted with ethyl acetate (15 mL  $\times$  3). The combined organic phase was washed with saturated NaCl solution, dried over anhydrous  $\text{MgSO}_4$  and the solvent was removed in vacuo. The crude product was purified by flash column chromatography.

### Characterization data

Ethyl-3-(benzylamino)-3-phenylacrylate (**8**)

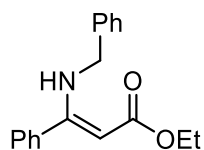

$^1\text{H}$  NMR (300 MHz, Chloroform-*d*)  $\delta$  9.02 (t,  $J$  = 6.4 Hz, 1H), 7.40 - 7.37 (m, 5H), 7.34 - 7.31 (m, 2H), 7.29 - 7.21 (m, 3H), 4.76 (s, 1H), 4.31 (d,  $J$  = 6.5 Hz, 2H), 4.21 (q,  $J$  = 7.1 Hz, 2H), 1.32 (t,  $J$  = 7.1 Hz, 3H).

Ethyl 2,5-diphenyl-1H-imidazole-4-carboxylate (**9**)

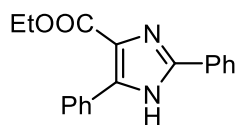

Yellow solid; 175 mg, yield: 60%

$^1\text{H}$  NMR (300 MHz, Chloroform-*d*)  $\delta$  10.13 (br), 7.97 - 7.95 (m, 4H), 7.48 - 7.38 (m, 6H), 4.35 (q,  $J$  = 7.1 Hz, 2H), 1.33 (t,  $J$  = 7.1 Hz, 3H).

MS:  $[\text{M}+\text{H}]^+$ ; 293.34, found: 293.3

### S13 X-ray crystallographic study

**Crystal structure determination.** The diffraction intensity data of **4b - d**, **5a - c** were collected at 173 K on a Rigaku XtaLAB PRO MM003-DS dual System with a Cu micro-focus source (Cu-K $\alpha$ ,  $\lambda$  = 1.54184 Å). The structure was refined by Olex2 program. The nonhydrogen atoms were refined anisotropically. The H atoms attached to carbons were added geometrically and refined isotropically with the riding model. The crystal data were collected in Table S4.

Table S4. Summary of single crystal X-ray diffraction analysis

|                                                             | <b>4b</b>                                         | <b>4c</b>                                       | <b>4d</b>                                       | <b>5a</b>                                      | <b>5b</b>                                      | <b>5c</b>                                      |
|-------------------------------------------------------------|---------------------------------------------------|-------------------------------------------------|-------------------------------------------------|------------------------------------------------|------------------------------------------------|------------------------------------------------|
| CCDC No.                                                    | 2306337                                           | 2306336                                         | 2306341                                         | 2306338                                        | 2306339                                        | 2306340                                        |
| Description                                                 | prism                                             | prism                                           | block                                           | block                                          | prism                                          | block                                          |
| Color                                                       | yellow                                            | colorless                                       | yellow                                          | colourless                                     | colourless                                     | colourless                                     |
| From solution                                               | DCM/Hexane                                        | DCM/Hexane                                      | DCM/Hexane                                      | DCM/Hexane                                     | DCM/Hexane                                     | DCM/Hexane                                     |
| Empirical formula                                           | C <sub>16</sub> H <sub>9</sub> ClN <sub>2</sub> O | C <sub>18</sub> H <sub>15</sub> NO <sub>3</sub> | C <sub>17</sub> H <sub>13</sub> NO <sub>2</sub> | C <sub>15</sub> H <sub>14</sub> O <sub>4</sub> | C <sub>14</sub> H <sub>12</sub> O <sub>3</sub> | C <sub>24</sub> H <sub>16</sub> O <sub>3</sub> |
| Formula weight                                              | 280.715                                           | 293.325                                         | 263.298                                         | 258.26                                         | 228.249                                        | 352.393                                        |
| Crystal system                                              | orthorhombic                                      | monoclinic                                      | orthorhombic                                    | monoclinic                                     | monoclinic                                     | monoclinic                                     |
| Space group                                                 | <i>Pccn</i>                                       | <i>P2<sub>1</sub>/c</i>                         | <i>Pbca</i>                                     | <i>P2<sub>1</sub>/c</i>                        | <i>P2<sub>1</sub>/n</i>                        | <i>P2<sub>1</sub></i>                          |
| <i>a</i> , Å                                                | 14.1800(2)                                        | 13.9261(3)                                      | 7.3350(2)                                       | 9.3720(2)                                      | 9.7106(2)                                      | 10.0411(2)                                     |
| <i>b</i> , Å                                                | 19.7617(3)                                        | 7.8917(2)                                       | 14.3799(3)                                      | 19.4732(4)                                     | 7.7880(1)                                      | 16.9542(3)                                     |
| <i>c</i> , Å                                                | 18.2437(2)                                        | 13.2129(3)                                      | 24.5438(7)                                      | 7.2389(1)                                      | 15.1238(3)                                     | 10.2605(2)                                     |
| $\alpha$ , deg                                              | 90                                                | 90                                              | 90                                              | 90                                             | 90                                             | 90                                             |
| $\beta$ , deg                                               | 90                                                | 98.325(2)                                       | 90                                              | 95.595(2)                                      | 102.369(2)                                     | 90.799(2)                                      |
| $\gamma$ , deg                                              | 90                                                | 90                                              | 90                                              | 90                                             | 90                                             | 90                                             |
| <i>V</i> , Å <sup>3</sup>                                   | 5112.27(12)                                       | 1436.80(6)                                      | 2588.80(12)                                     | 1314.83(4)                                     | 1117.21(4)                                     | 1746.57(6)                                     |
| <i>Z</i>                                                    | 16                                                | 4                                               | 8                                               | 4                                              | 4                                              | 4                                              |
| $\rho$ calcd, g cm <sup>-3</sup>                            | 1.459                                             | 1.356                                           | 1.351                                           | 1.305                                          | 1.357                                          | 1.340                                          |
| <i>R</i> <sub>I</sub> [ <i>I</i> > 2 $\sigma$ ( <i>I</i> )] | 0.0445                                            | 0.0405                                          | 0.0490                                          | 0.0436                                         | 0.0380                                         | 0.0371                                         |
| <i>wR</i> <sub>2</sub> (all data)                           | 0.1446                                            | 0.1049                                          | 0.1517                                          | 0.1305                                         | 0.1386                                         | 0.0826                                         |

## S14 References

1. L. J. Gooßen, N. Rodríguez, F. Manjolinho and P. P. Lange, Synthesis of Propiolic Acids via Copper-Catalyzed Insertion of Carbon Dioxide into the C-H Bond of Terminal Alkynes, *Advanced Synthesis & Catalysis*, 2010, **352**, 2913-2917.
2. D. Yu and Y. Zhang, Copper- and Copper-N-heterocyclic Carbene-catalyzed C-H Activating Carboxylation of Terminal Alkynes with CO<sub>2</sub> at Ambient Conditions, *Proc. Natl. Acad. Sci.*, 2010, **107**, 20184-20189.
3. M. Trivedi, G. Singh, A. Kumar and N. P. Rath, 1,1'-Bis(di-tert-butylphosphino)ferrocene Copper(I) Complex Catalyzed C-H Activation and Carboxylation of Terminal Alkynes, *Dalton Trans.*, 2015, **44**, 20874-20882.
4. W.-H. Wang, L. Jia, X. Feng, D. Fang, H. Guo and M. Bao, Efficient Carboxylation of Terminal Alkynes with Carbon Dioxide Catalyzed by Ligand-Free Copper Catalyst under Ambient Conditions, *Asian J. Org. Chem.*, 2019, **8**, 1501-1505.
5. H. Diaz Velazquez, Z.-X. Wu, M. Vandichel and F. Verpoort, Inserting CO<sub>2</sub> into Terminal Alkynes via Bis-(NHC)-Metal Complexes, *Catal. Lett.*, 2017, **147**, 463-471.
6. M. Arndt, E. Risto, T. Krause and L. J. Goossen, C-H Carboxylation of Terminal Alkynes Catalyzed by Low Loadings of Silver(I)/DMSO at Ambient CO<sub>2</sub> Pressure, *ChemCatChem*, 2012, **4**, 484-487.
7. H. Cheng, B. Zhao, Y. Yao and C. Lu, Carboxylation of terminal alkynes with CO<sub>2</sub> catalyzed by bis(amidate) rare-earth metal amides, *Green Chem.*, 2015, **17**, 1675-1682.
8. F. Chen, S. Tao, N. Liu and B. Dai, N-Heterocyclic Carbene-nitrogen Molybdenum Catalysts for Utilization of CO<sub>2</sub>, *Polyhedron*, 2021, **196**, 114990.
9. B. Yu, Z.-F. Diao, C.-X. Guo, C.-L. Zhong, L.-N. He, Y.-N. Zhao, Q.-W. Song, A.-H. Liu and J.-Q. Wang, Carboxylation of Terminal Alkynes at Ambient CO<sub>2</sub> Pressure in Ethylene Carbonate, *Green Chemistry*, 2013, **15**, 2401-2407.
10. Z. Wu, L. Sun, Q. Liu, X. Yang, X. Ye, Y. Hu and Y. Huang, A Schiff Base-modified Silver Catalyst for Efficient Fixation of CO<sub>2</sub> as Carboxylic Acid at Ambient Pressure, *Green Chem.*, 2017, **19**, 2080-2085.
11. U. C. Rajesh, Y. Losovyj, C.-H. Chen and J. M. Zaleski, Designing Synergistic Nanocatalysts for Multiple Substrate Activation: Interlattice Ag-Fe<sub>3</sub>O<sub>4</sub> Hybrid Materials for CO<sub>2</sub>-Inserted Lactones, *ACS Catal.*, 2020, **10**, 3349-3359.
12. S. Das, P. Mondal, S. Ghosh, B. Satpati, S. Deka, S. M. Islam and T. Bala, A Facile Synthesis Strategy to Couple Porous Nanocubes of CeO<sub>2</sub> with Ag Nanoparticles: An Excellent Catalyst with Enhanced Reactivity for the 'Click Reaction' and Carboxylation of Terminal Alkynes, *New Journal of Chemistry*, 2018, **42**, 7314-7325.
13. X. Lan, Y. Li, C. Du, T. She, Q. Li and G. Bai, Porous Carbon Nitride Frameworks Derived from Covalent Triazine Framework Anchored Ag Nanoparticles for Catalytic CO<sub>2</sub> Conversion, *Chem. - Eur. J.*, 2019, **25**, 8560-8569.
14. P. Yang, S. Zuo, F. Zhang, B. Yu, S. Guo, X. Yu, Y. Zhao, J. Zhang and Z. Liu, Carbon Nitride-Based Single-Atom Cu Catalysts for Highly Efficient Carboxylation of Alkynes with Atmospheric CO<sub>2</sub>, *Ind. Eng. Chem. Res.*, 2020, **59**, 7327-7335.
15. X.-H. Liu, J.-G. Ma, Z. Niu, G.-M. Yang and P. Cheng, An Efficient Nanoscale Heterogeneous Catalyst for the Capture and Conversion of Carbon Dioxide at Ambient Pressure, *Angew. Chem., Int. Ed.*, 2015, **54**, 988-991.
16. R. A. Molla, K. Ghosh, B. Banerjee, M. A. Iqbal, S. K. Kundu, S. M. Islam and A. Bhaumik, Silver Nanoparticles Embedded Over Porous Metal Organic Frameworks for Carbon Dioxide Fixation via Carboxylation of Terminal Alkynes at Ambient Pressure, *J. Colloid Interface Sci.*, 2016, **477**, 220-229.
17. Y. Gong, Y. Yuan, C. Chen, P. Zhang, J. Wang, S. Zhuikov, S. Chaemchuen and F. Verpoort, Core-shell Metal-organic Frameworks and Metal Functionalization to Access Highest Efficiency in Catalytic Carboxylation, *J. Catal.*, 2019, **371**, 106-115.

18. Y. Yun, H. Sheng, K. Bao, L. Xu, Y. Zhang, D. Astruc and M. Zhu, Design and Remarkable Efficiency of the Robust Sandwich Cluster Composite Nanocatalysts ZIF-8@Au<sub>25</sub>@ZIF-67, *J. Am. Chem. Soc.*, 2020, **142**, 4126-4130.
19. D. Yu, M. X. Tan and Y. Zhang, Carboxylation of Terminal Alkynes with Carbon Dioxide Catalyzed by Poly(N-Heterocyclic Carbene)-Supported Silver Nanoparticles, *Adv. Synth. Catal.*, 2012, **354**, 969-974.
20. S. Ghosh, A. Ghosh, S. Riyajuddin, S. Sarkar, A. H. Chowdhury, K. Ghosh and S. M. Islam, Silver Nanoparticles Architected HMP as a Recyclable Catalyst for Tetramic Acid and Propiolic Acid Synthesis through CO<sub>2</sub> Capture at Atmospheric Pressure, *ChemCatChem*, 2020, **12**, 1055-1067.
21. D. J. Shah, A. S. Sharma, A. P. Shah, V. S. Sharma, M. Athar and J. Y. Soni, Fixation of CO<sub>2</sub> as A Carboxylic Acid Precursor by Microcrystalline Cellulose (MCC) Supported Ag NPs: A More Efficient, Sustainable, Biodegradable and Eco-friendly Catalyst, *New J. Chem.*, 2019, **43**, 8669-8676.
22. A. Modak, P. Bhanja and A. Bhaumik, Microporous Nanotubes and Nanospheres with Iron-Catechol Sites: Efficient Lewis Acid Catalyst and Support for Ag Nanoparticles in CO<sub>2</sub> Fixation Reaction, *Chem. - Eur. J.*, 2018, **24**, 14189-14197.
23. Q.-Q. Dang, C.-Y. Liu, X.-M. Wang and X.-M. Zhang, Novel Covalent Triazine Framework for High-Performance CO<sub>2</sub> Capture and Alkyne Carboxylation Reaction, *ACS Appl. Mater. Interfaces*, 2018, **10**, 27972-27978.
24. X. Lan, C. Du, L. Cao, T. She, Y. Li and G. Bai, Ultrafine Ag Nanoparticles Encapsulated by Covalent Triazine Framework Nanosheets for CO<sub>2</sub> Conversion, *ACS Appl. Mater. Interfaces*, 2018, **10**, 38953-38962.
25. R. Bu, L. Zhang, L.-L. Gao, W.-J. Sun, S.-L. Yang and E.-Q. Gao, Copper(I)-modified covalent organic framework for CO<sub>2</sub> insertion to terminal alkynes, *Mol. Catal.*, 2021, **499**, 111319.
26. Y. Li, Y. Dong, J.-L. Kan, X. Wu and Y.-B. Dong, Synthesis and Catalytic Properties of Metal-N-Heterocyclic-Carbene-Decorated Covalent Organic Framework, *Org. Lett.*, 2020, **22**, 7363-7368.
27. J.-B. Shi, Q. Bu, B.-Y. Liu, B. Dai and N. Liu, Organocatalytic Strategy for the Fixation of CO<sub>2</sub> via Carboxylation of Terminal Alkynes, *J. Org. Chem.*, 2021, **86**, 1850-1860.
28. L. Zhang, R. Bu, X.-Y. Liu, P.-F. Mu and E.-Q. Gao, Schiff-base Molecules and COFs as Metal-free Catalysts or Silver Supports for Carboxylation of Alkynes with CO<sub>2</sub>, *Green Chem.*, 2021, **23**, 7620-7629.
29. P.-F. Mu, L. Zhang, R. Bu, L.-F. Xiong, Y.-W. Liu and E.-Q. Gao, Guanidine-based Covalent Organic Frameworks: Cooperation between Cores and Linkers for Chromic Sensing and Efficient CO<sub>2</sub> Conversion, *ACS Appl. Mater. Interfaces*, 2023, **15**, 6902-6911.
30. L. Zhang and E.-Q. Gao, Catalytic C(sp)-H Carboxylation with CO<sub>2</sub>, *Coord. Chem. Rev.*, 2023, **486**, 215138.

# S15 Copies of $^1\text{H}$ NMR spectra of products

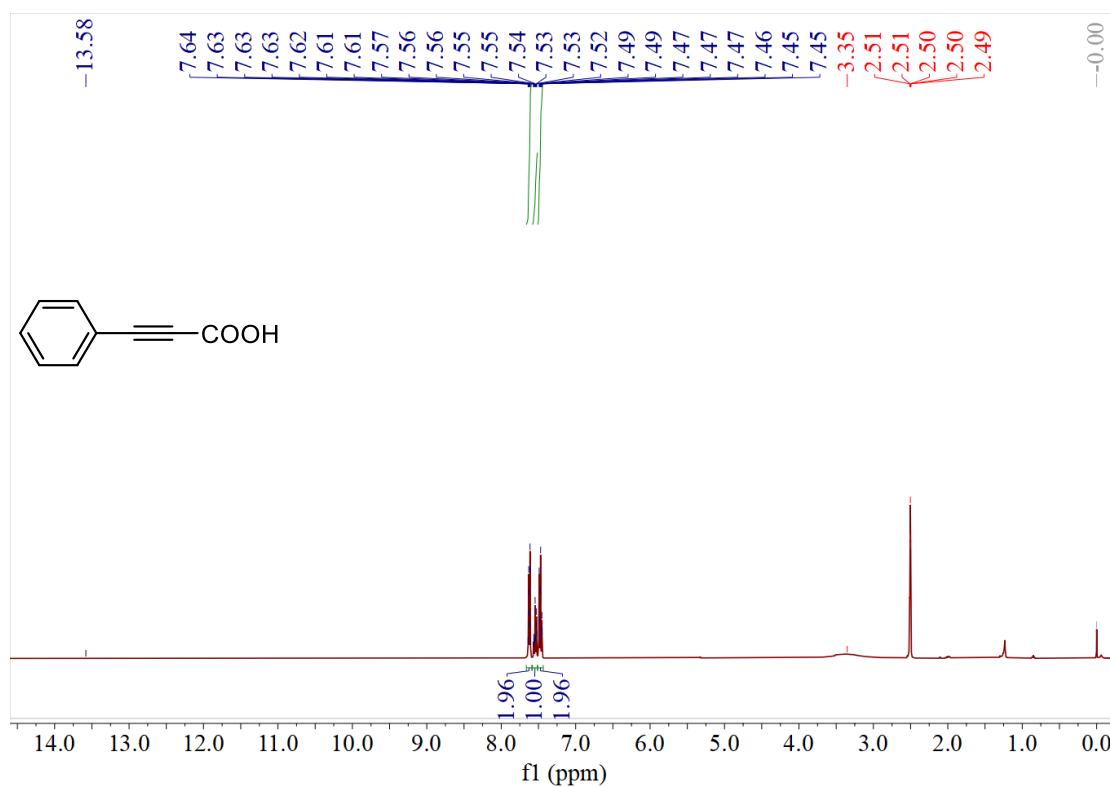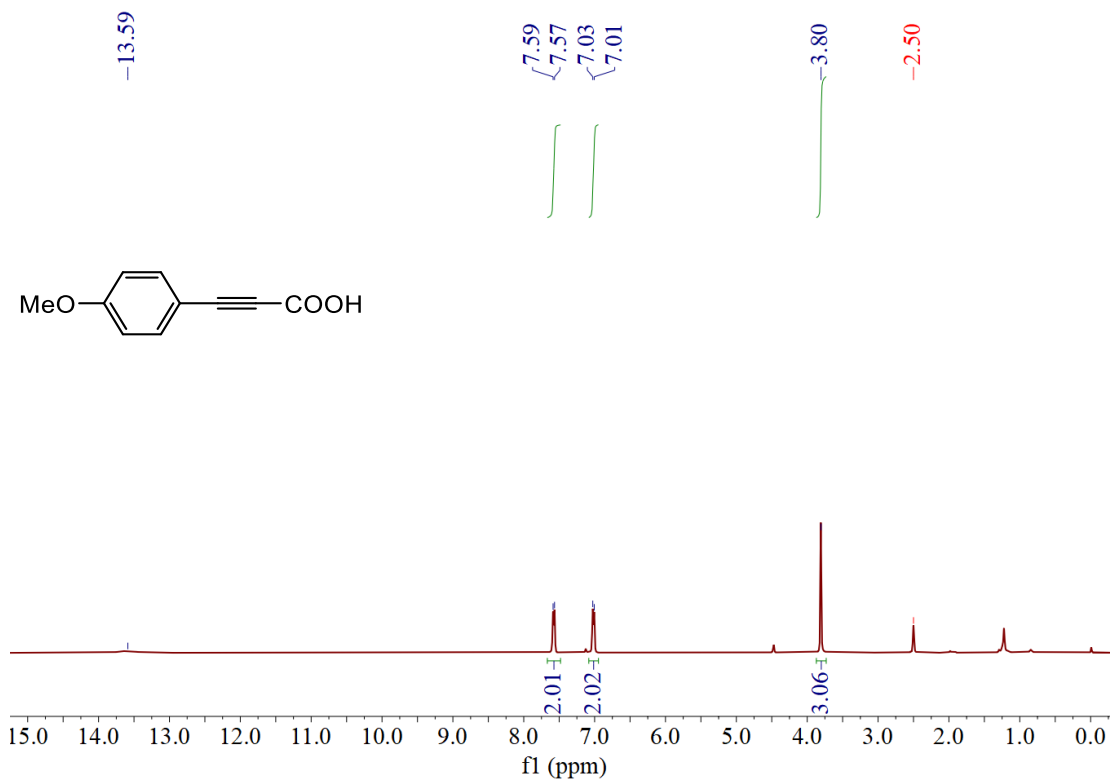

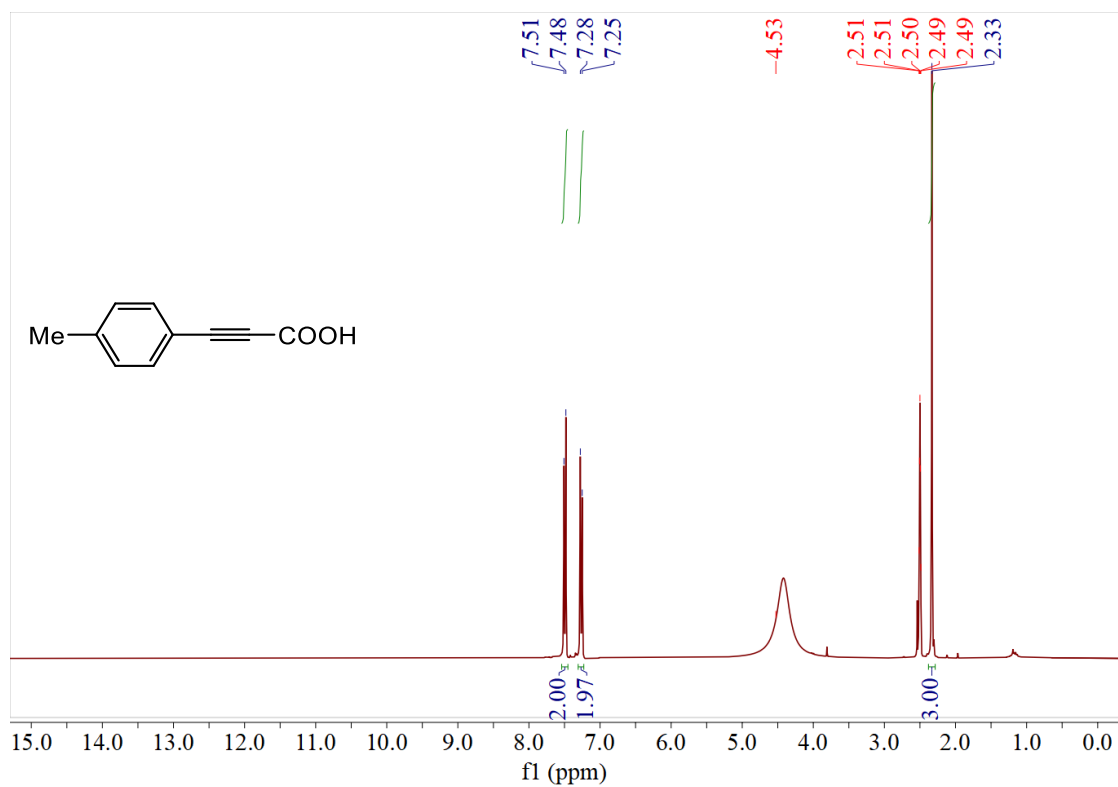

<sup>1</sup>H NMR (400 MHz) spectrum of **2c** in DMSO-*d*<sub>6</sub>

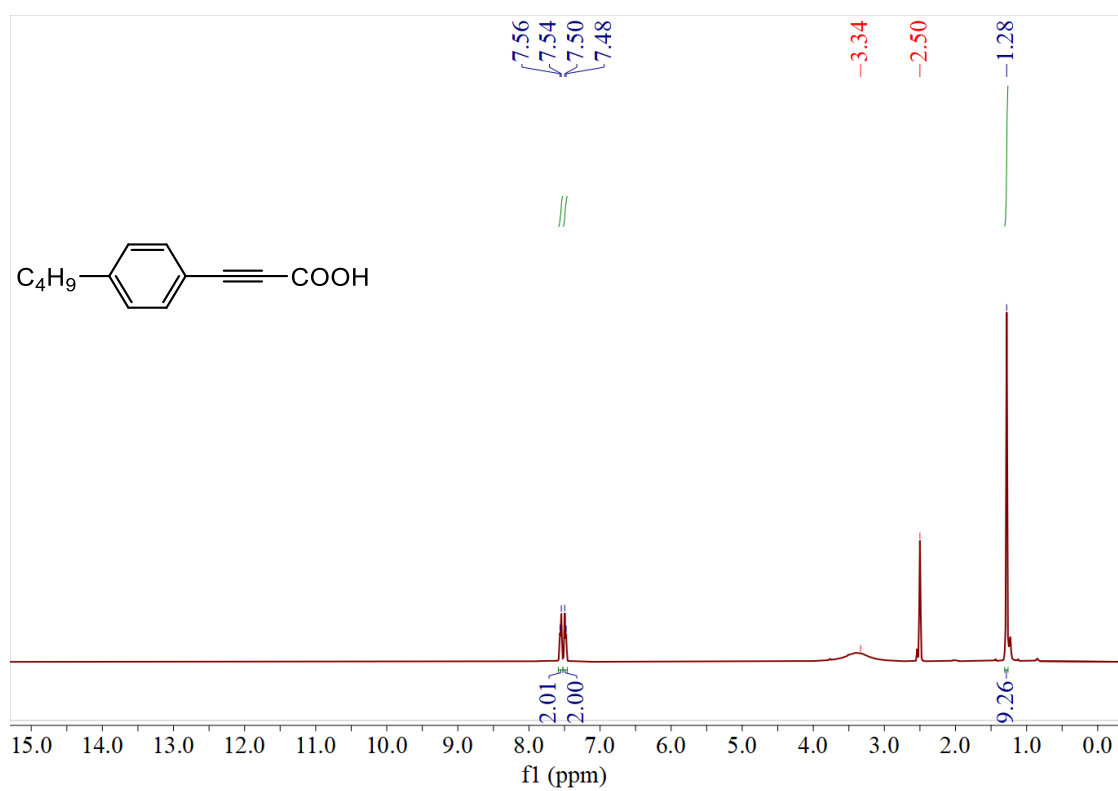

<sup>1</sup>H NMR (300 MHz) spectrum of **2d** in DMSO-*d*<sub>6</sub>

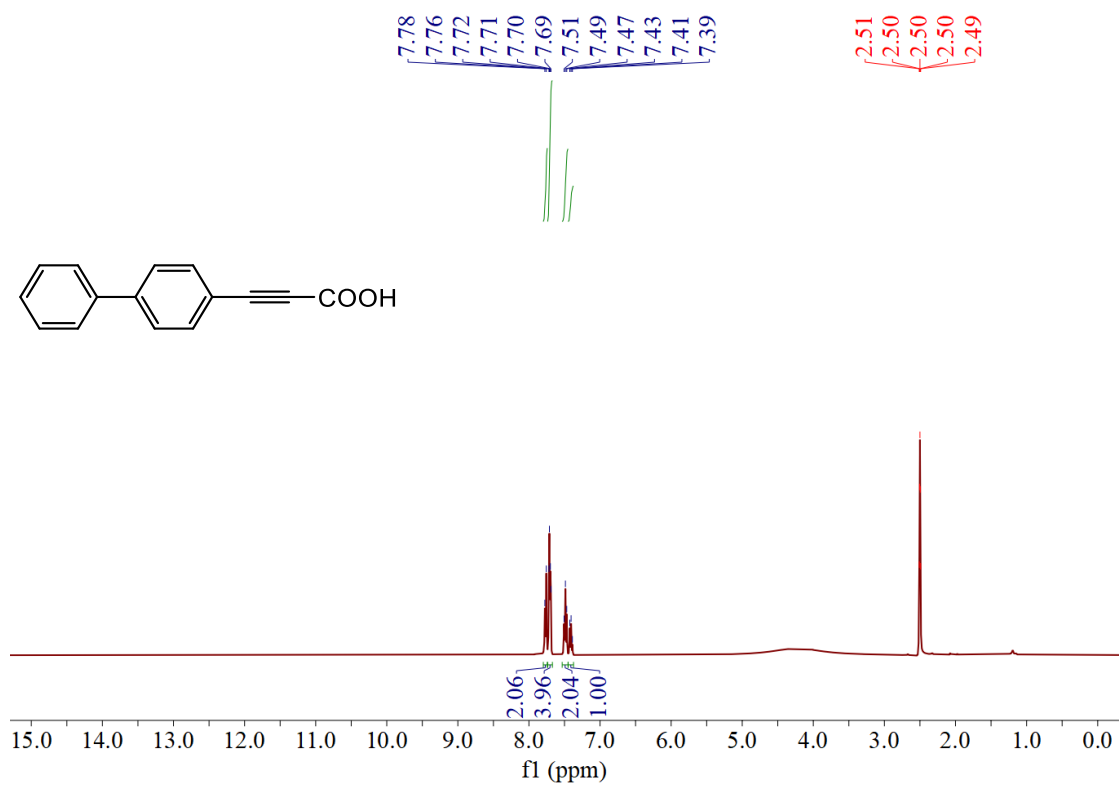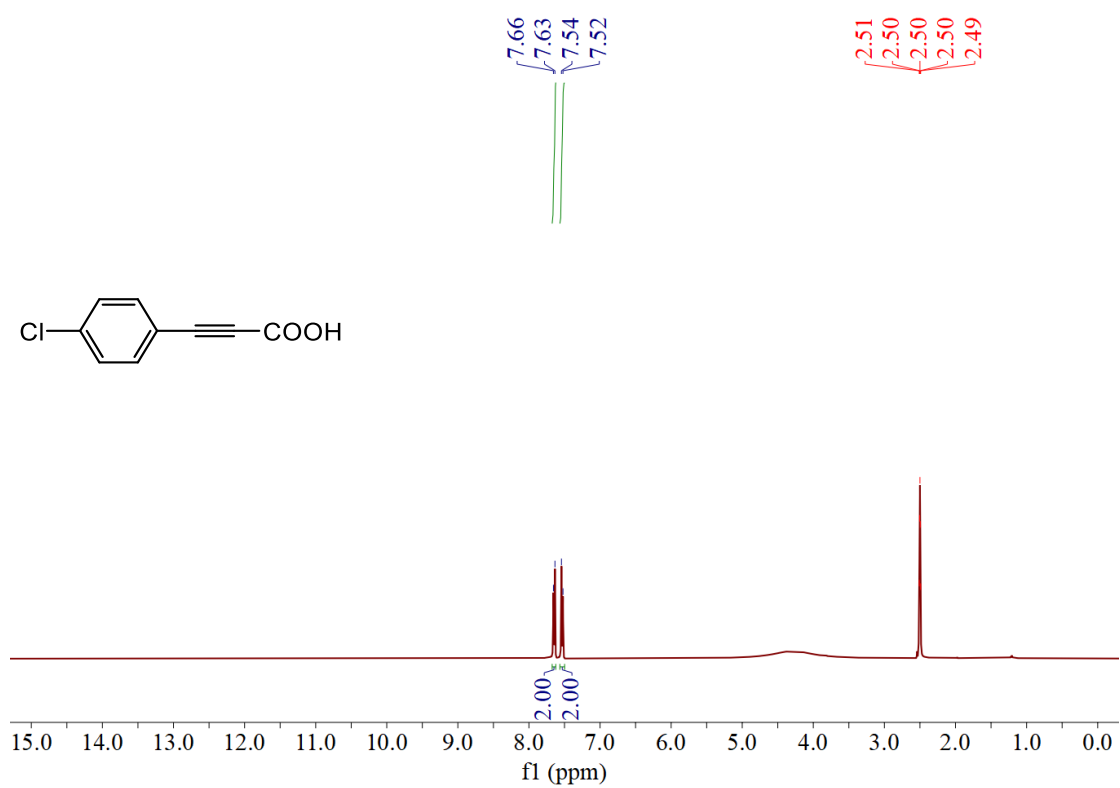

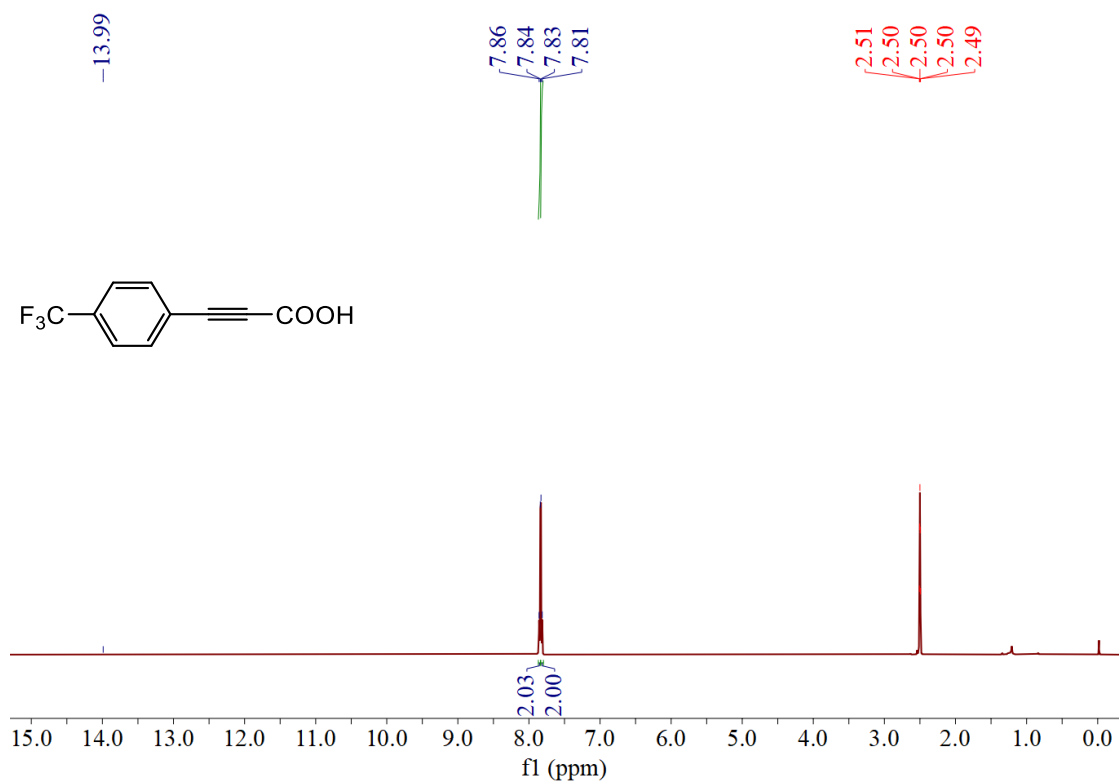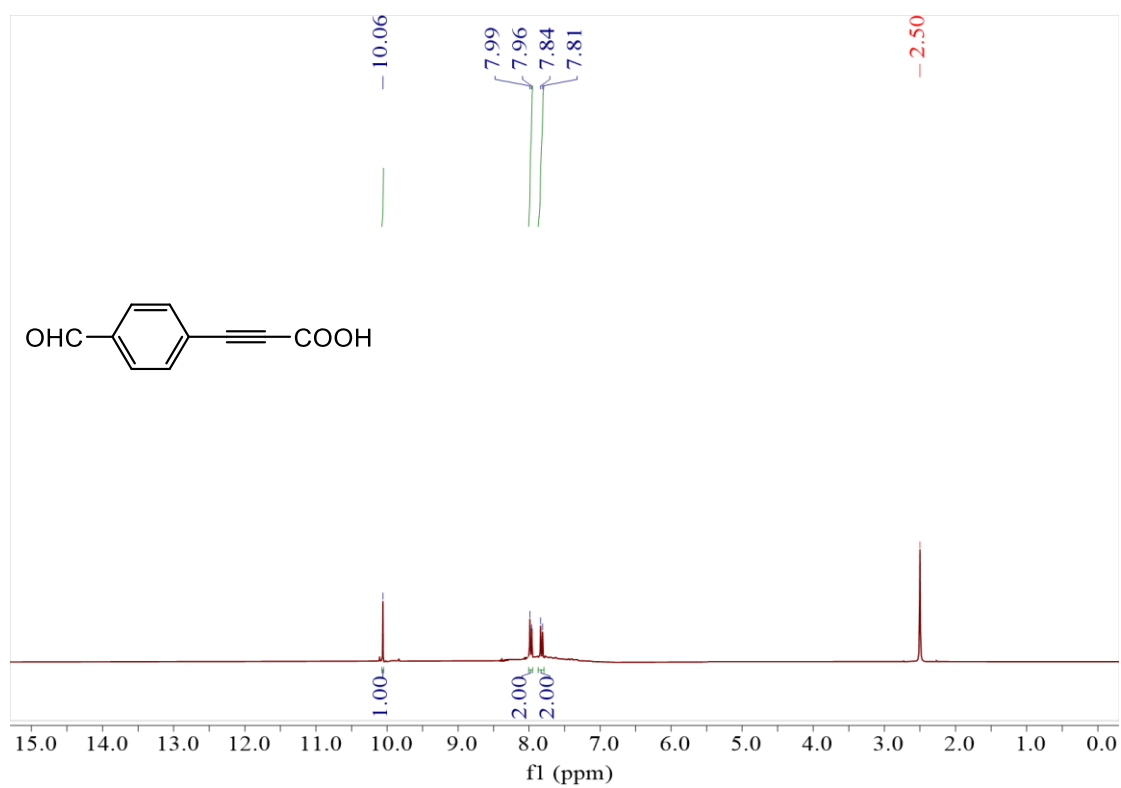

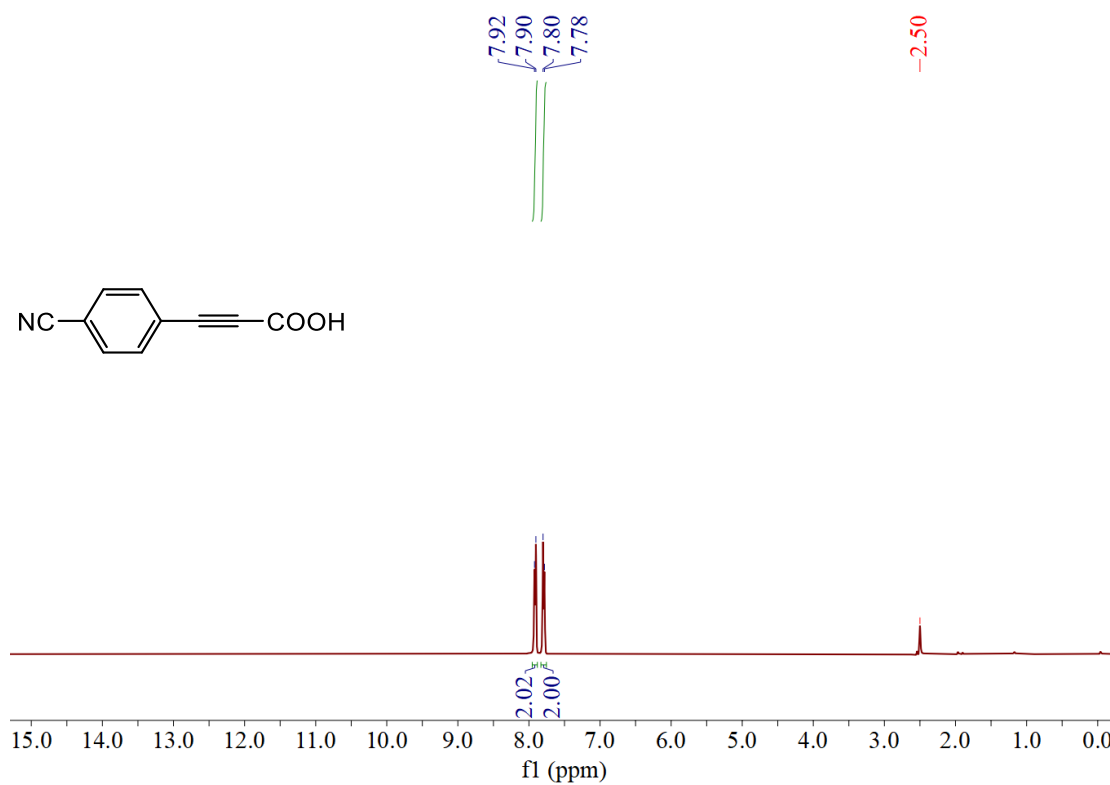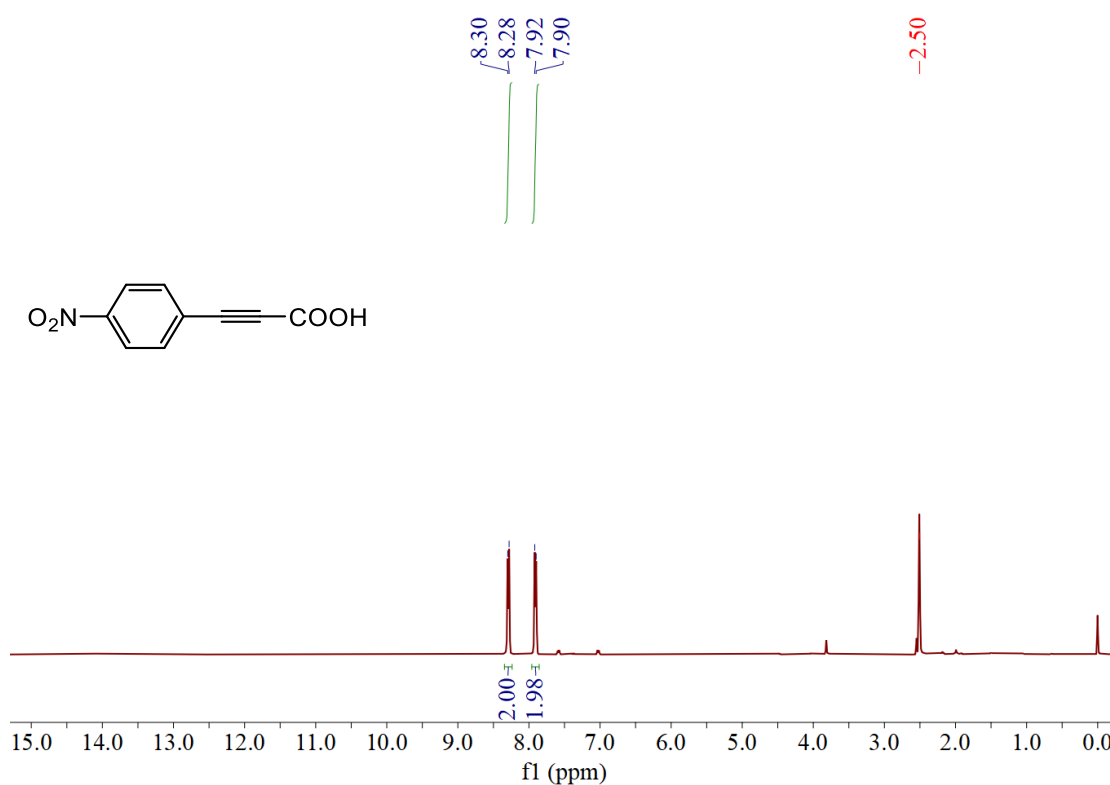

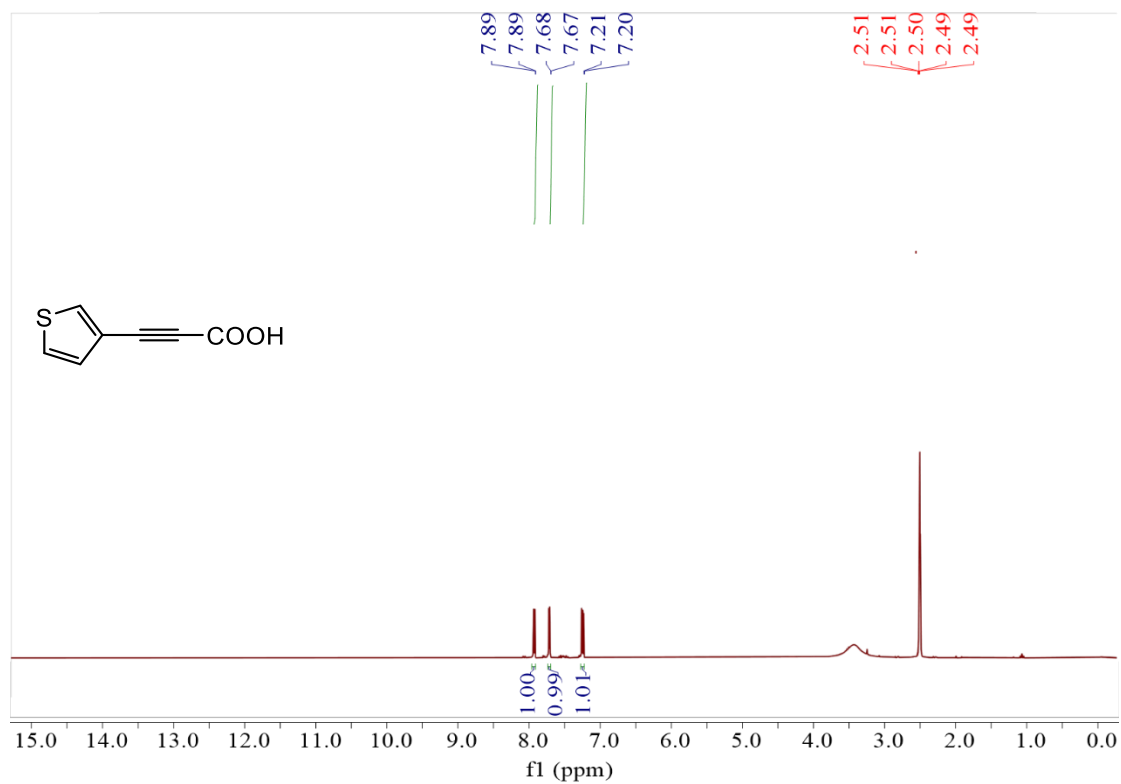

<sup>1</sup>H NMR (500 MHz) spectrum of **2k** in DMSO-*d*<sub>6</sub>

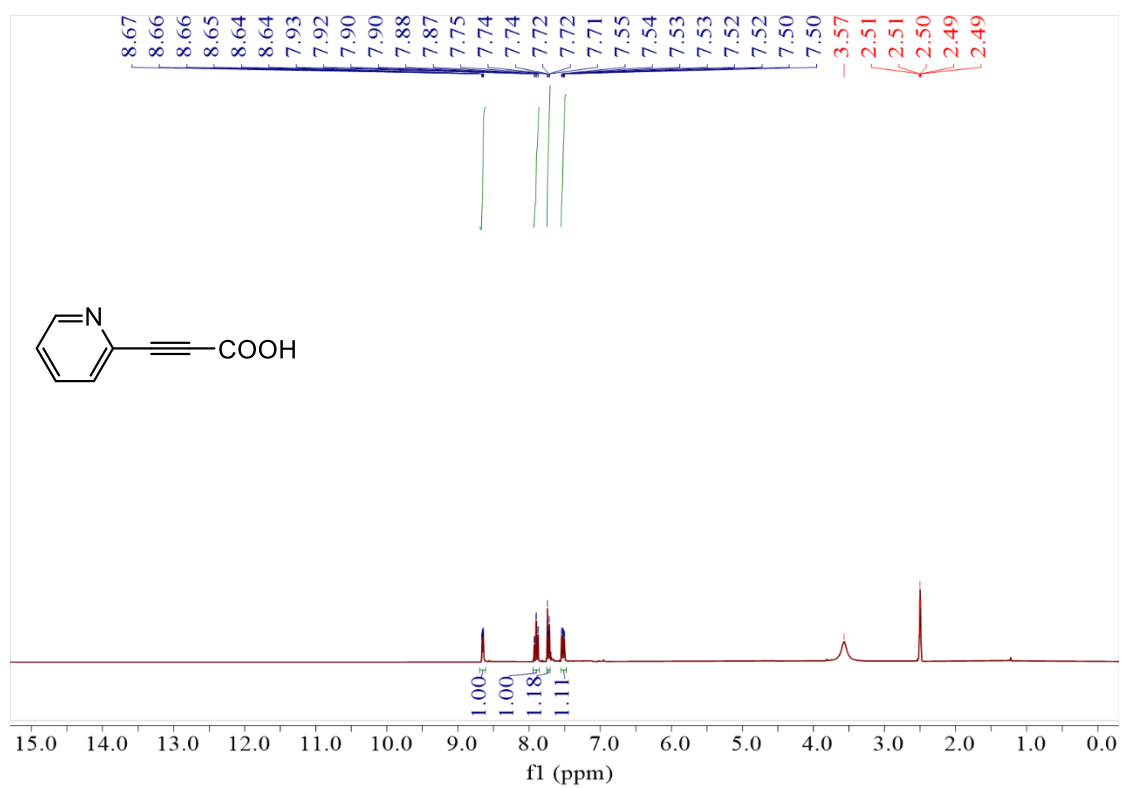

<sup>1</sup>H NMR (500 MHz) spectrum of **2l** in DMSO-*d*<sub>6</sub>

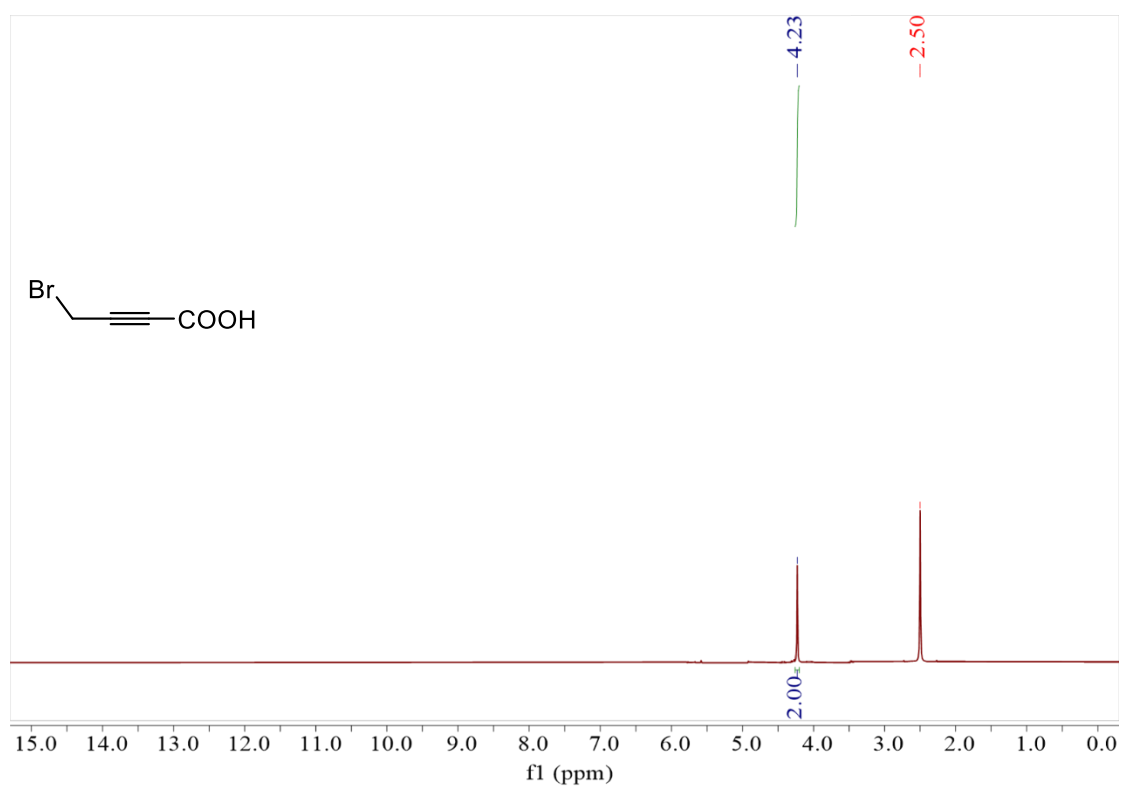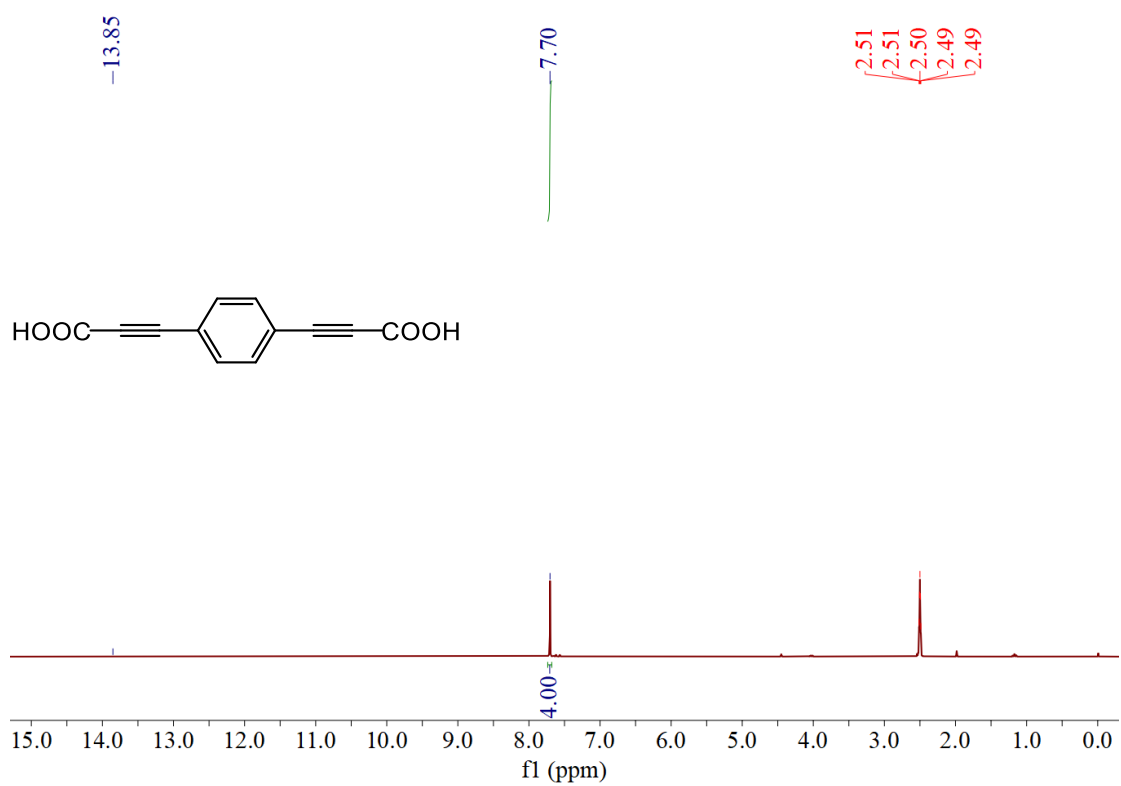

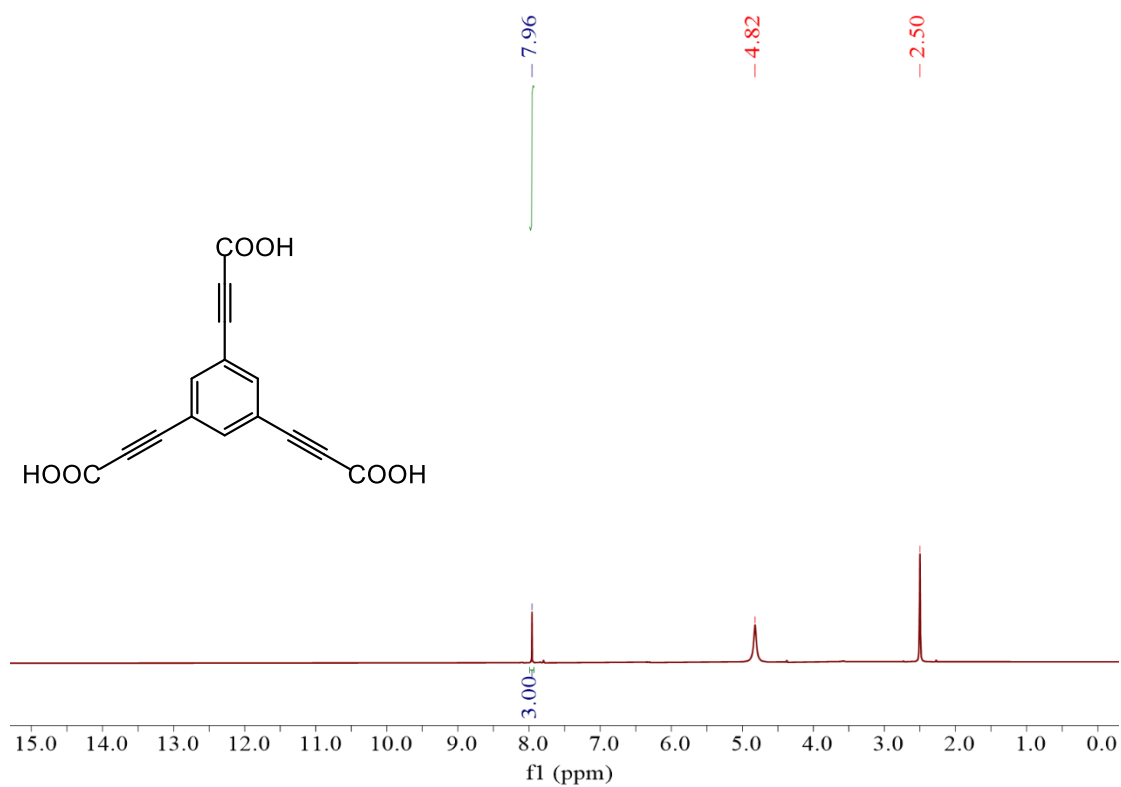

$^1\text{H}$  NMR (300 MHz) spectrum of **2r** in  $\text{DMSO}-d_6$

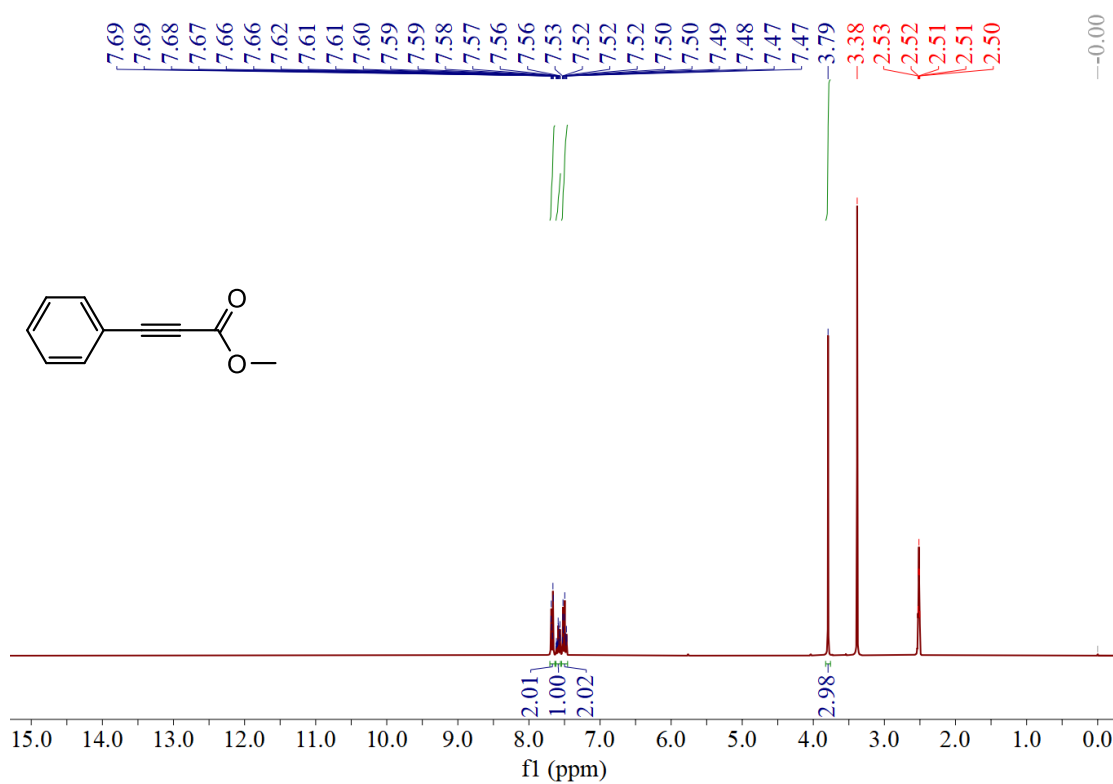

$^1\text{H}$  NMR (300 MHz) spectrum of **3a** in  $\text{DMSO}-d_6$

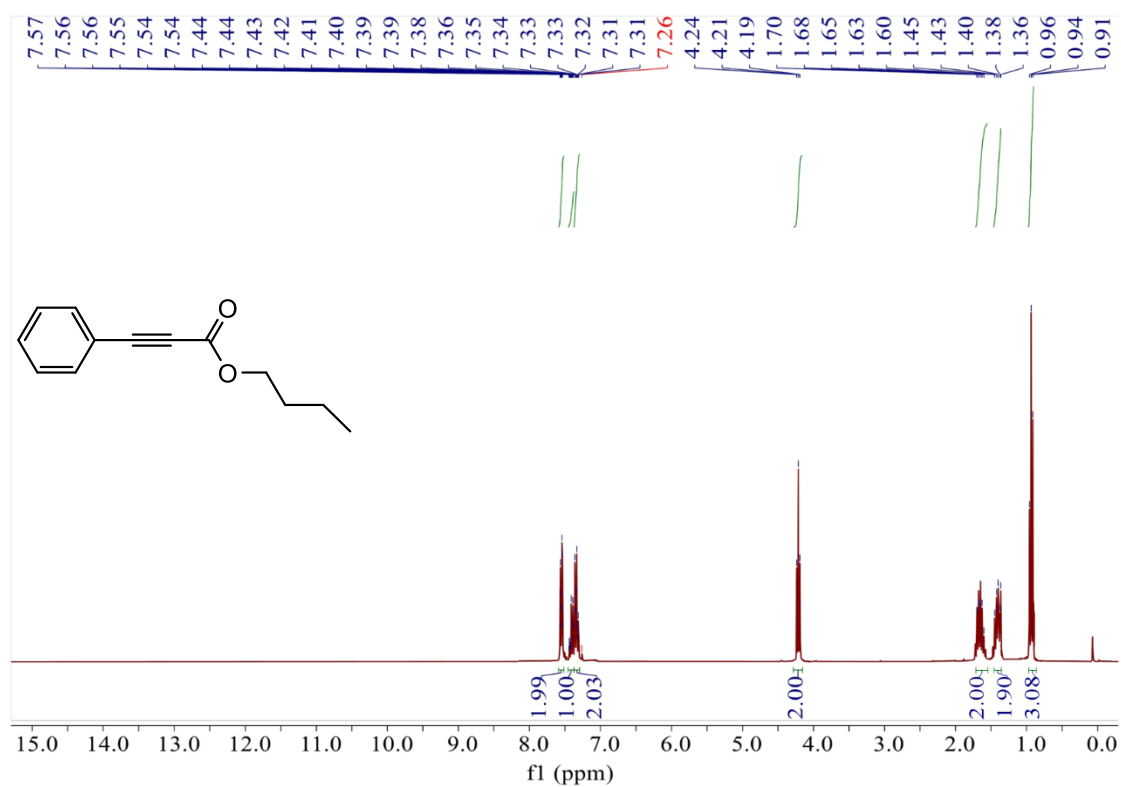

$^1\text{H}$  NMR (300 MHz) spectrum of **3b** in  $\text{DMSO}-d_6$

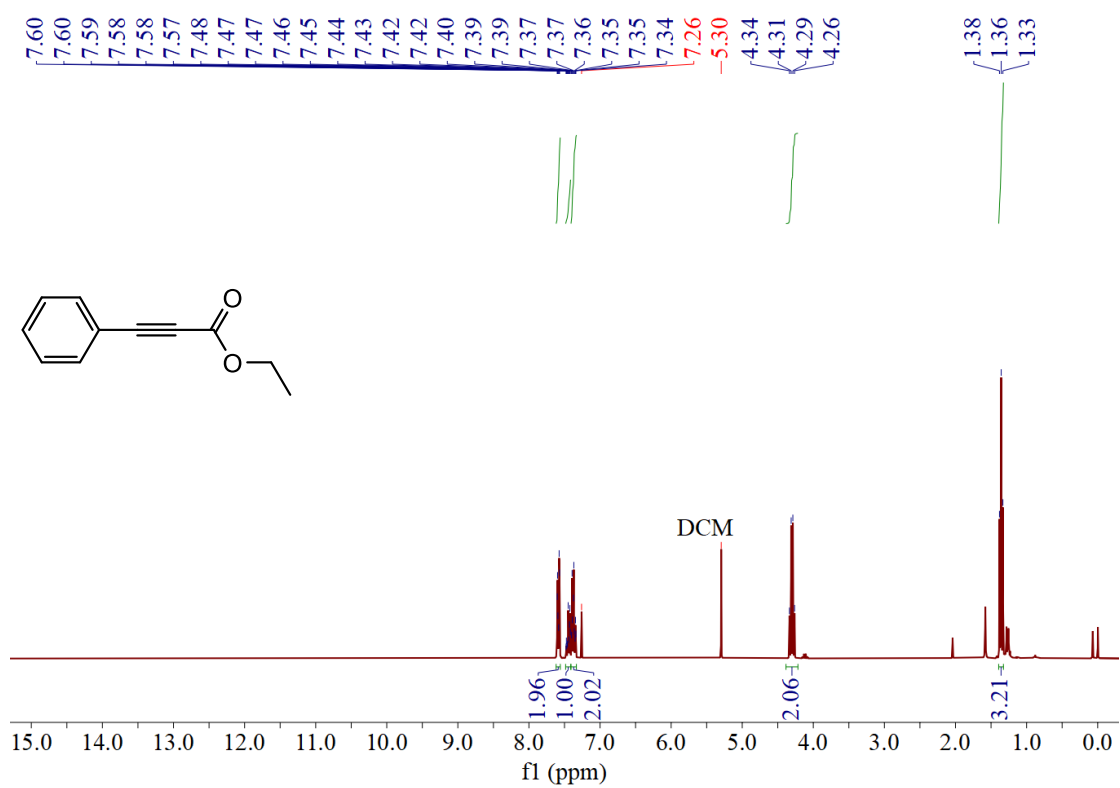

$^1\text{H}$  NMR (300 MHz) spectrum of **3c** in  $\text{Chloroform}-d$

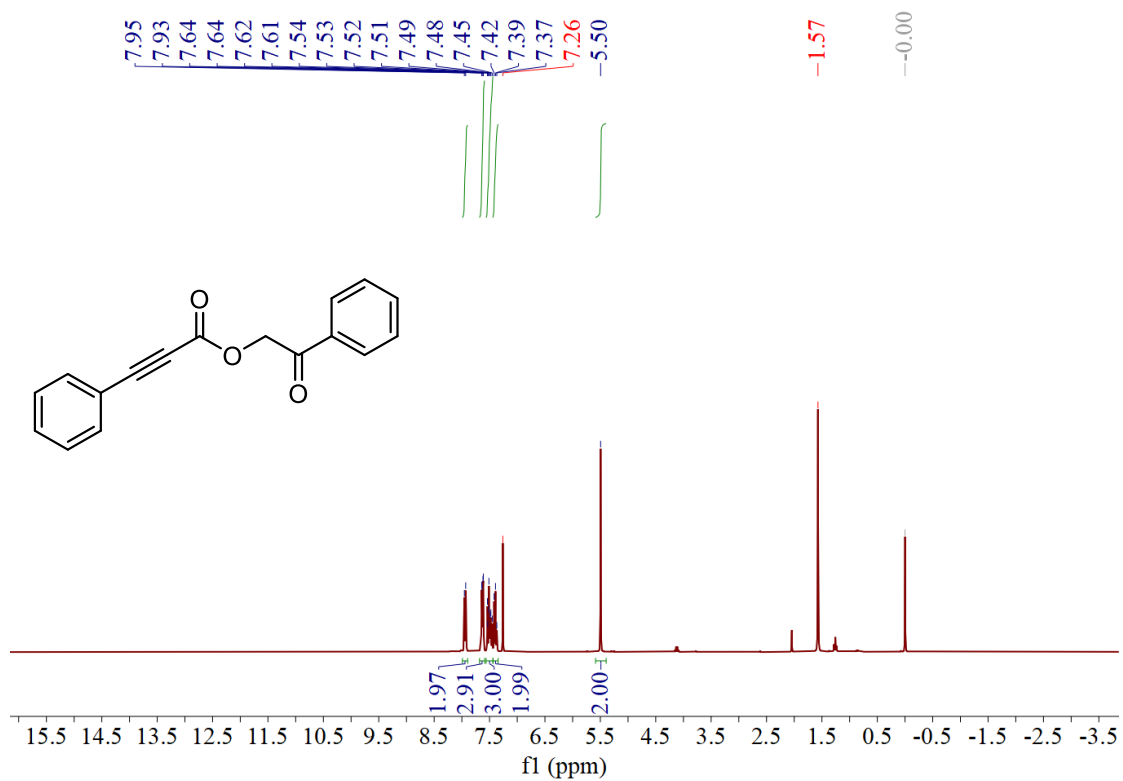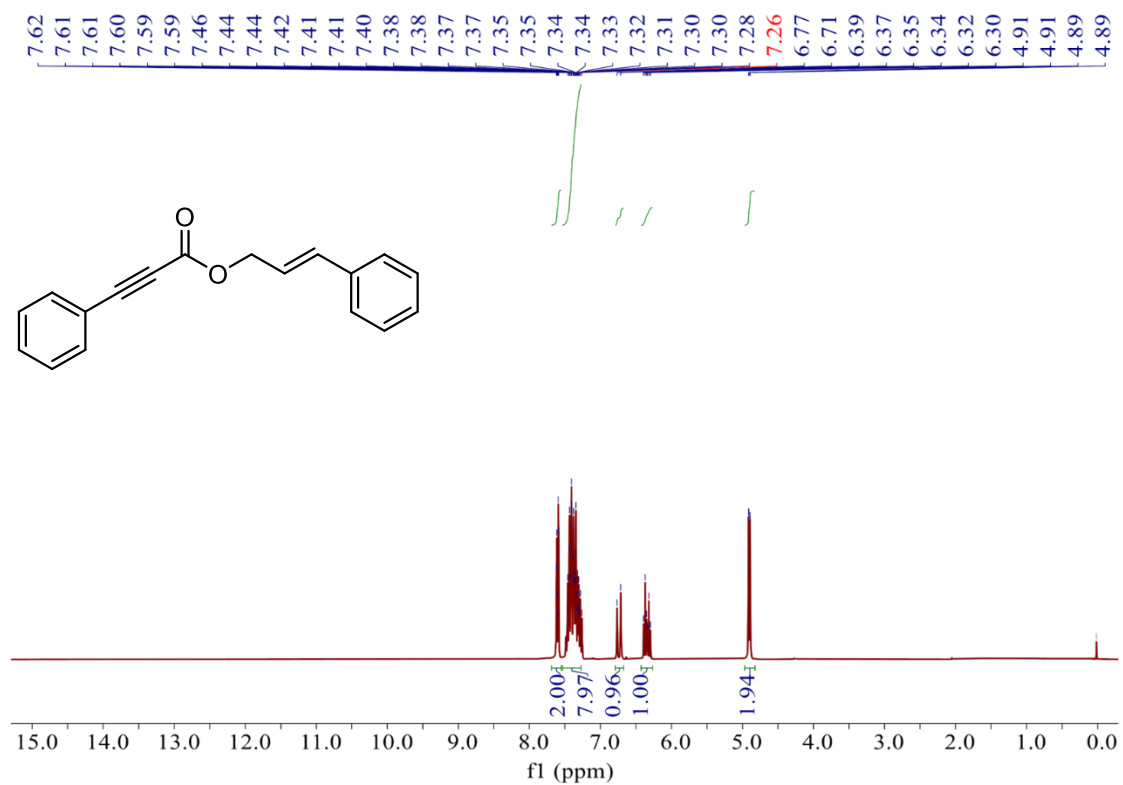

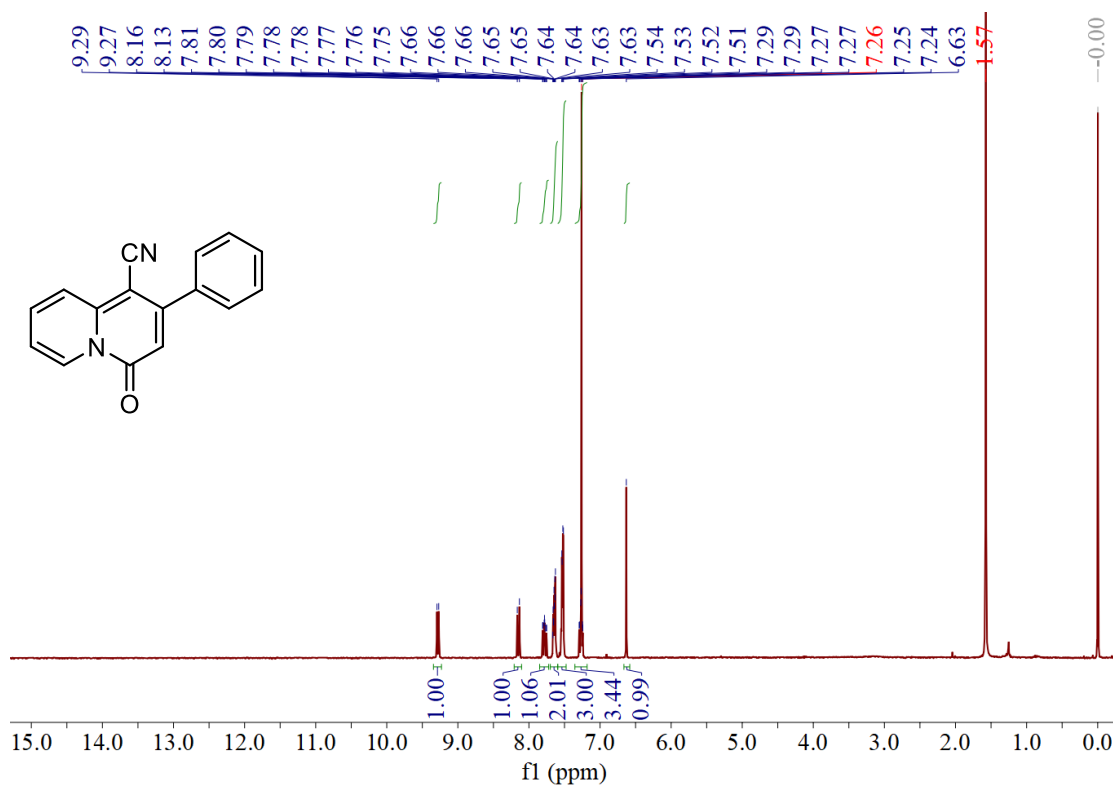

<sup>1</sup>H NMR (300 MHz) spectrum of **4a** in Chloroform-*d*

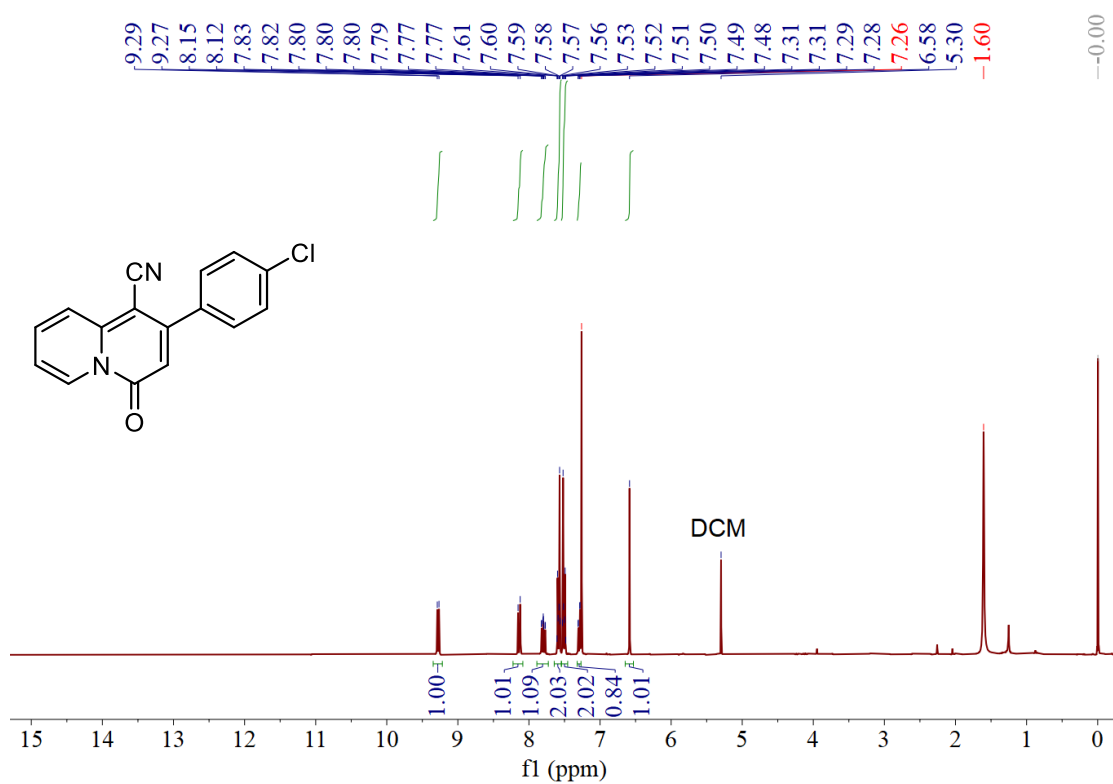

<sup>1</sup>H NMR (300 MHz) spectrum of **4b** in Chloroform-*d*

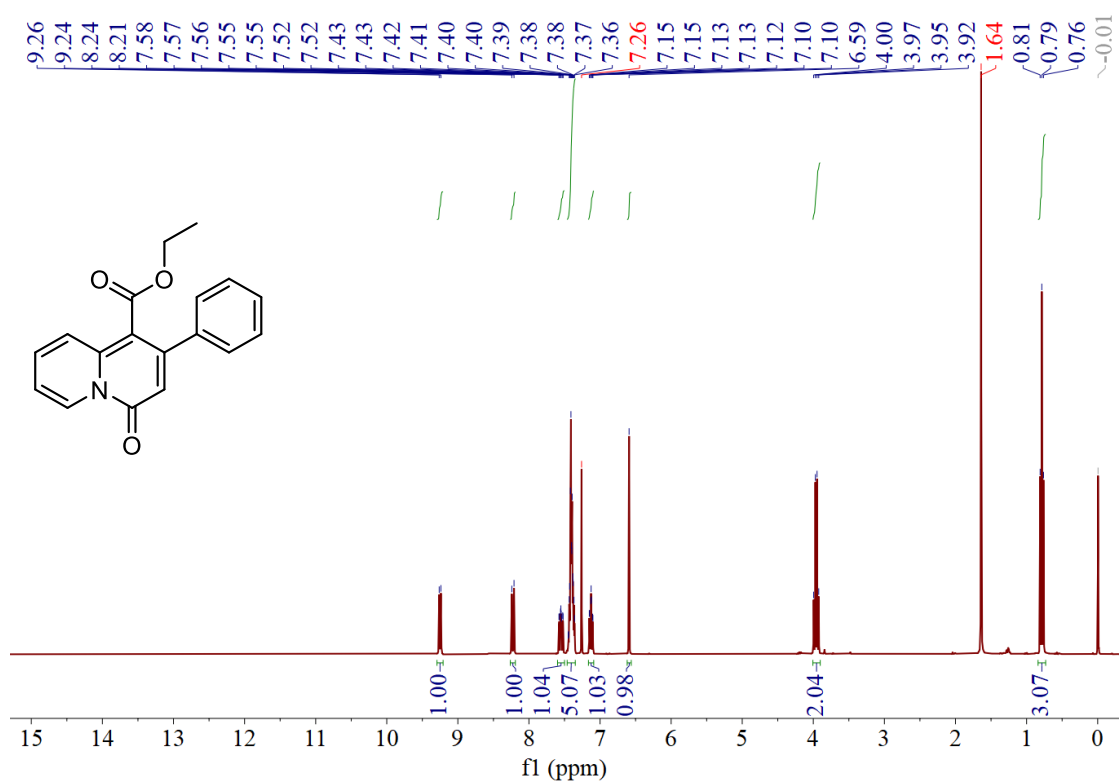

<sup>1</sup>H NMR (400 MHz) spectrum of **4c** in Chloroform-*d*

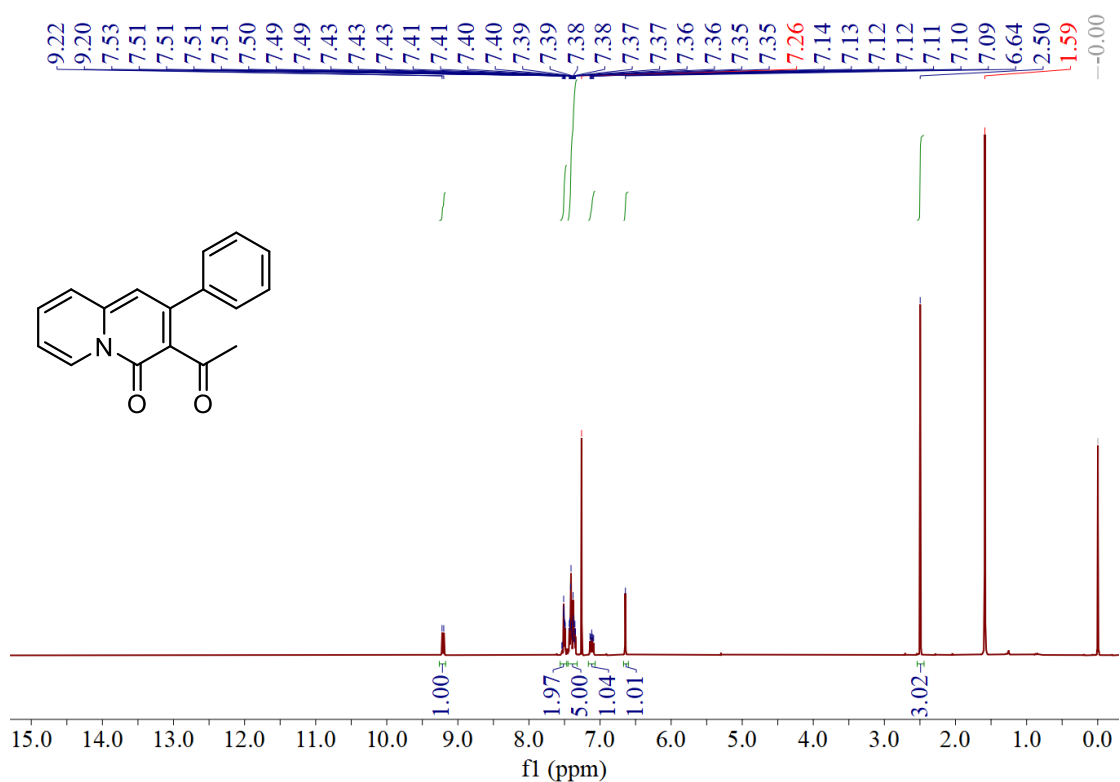

<sup>1</sup>H NMR (300 MHz) spectrum of **4d** in Chloroform-*d*

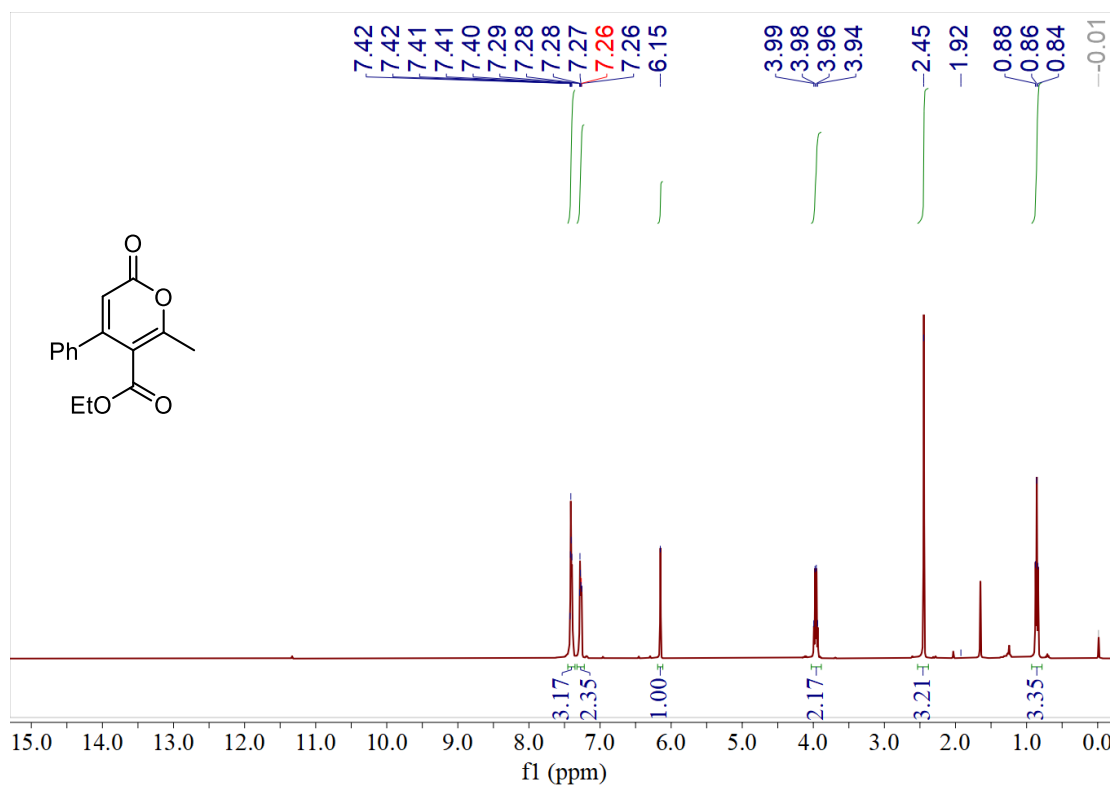

$^1\text{H}$  NMR (400 MHz) spectrum of **5a** in Chloroform-*d*

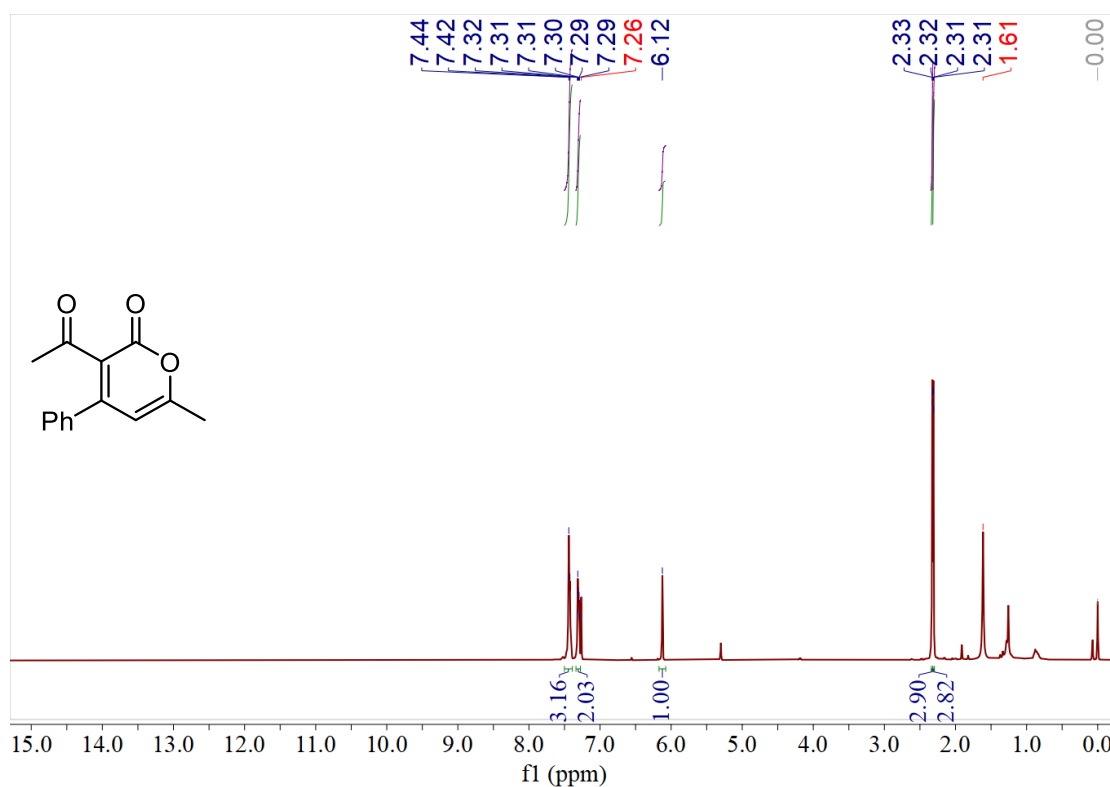

$^1\text{H}$  NMR (400 MHz) spectrum of **5b** in Chloroform-*d*

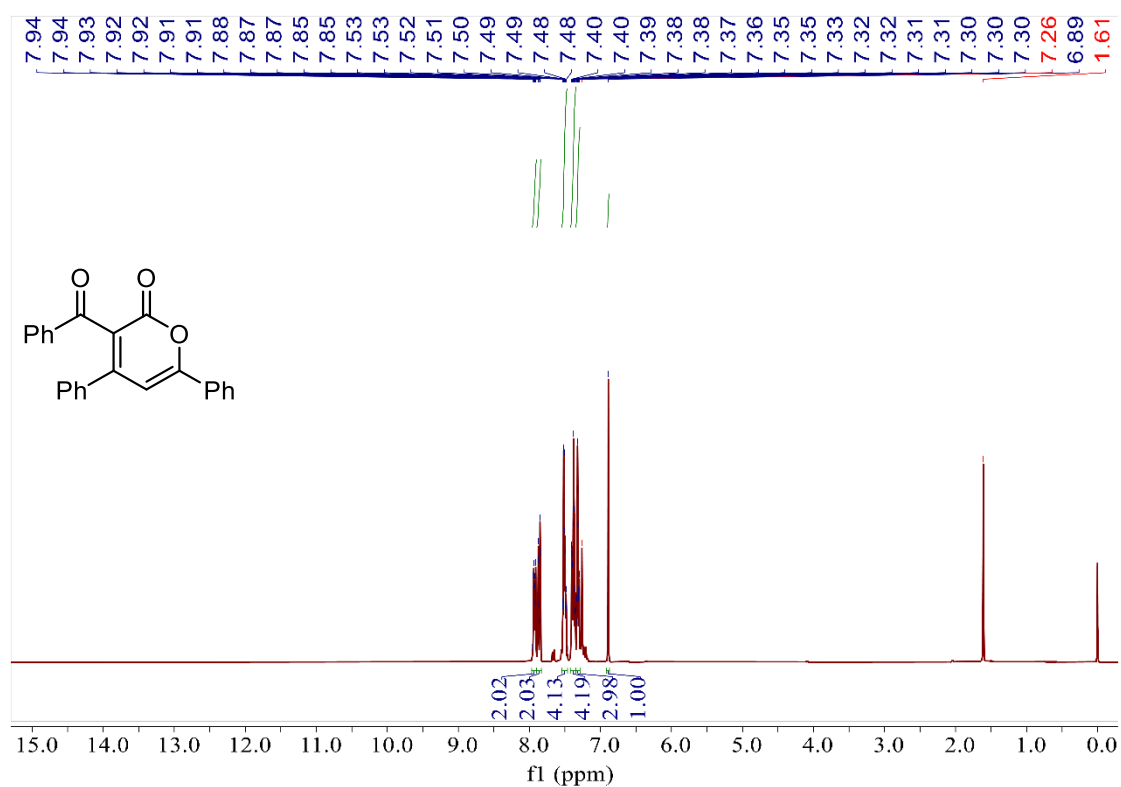

<sup>1</sup>H NMR (300 MHz) spectrum of **5c** in Chloroform-*d*

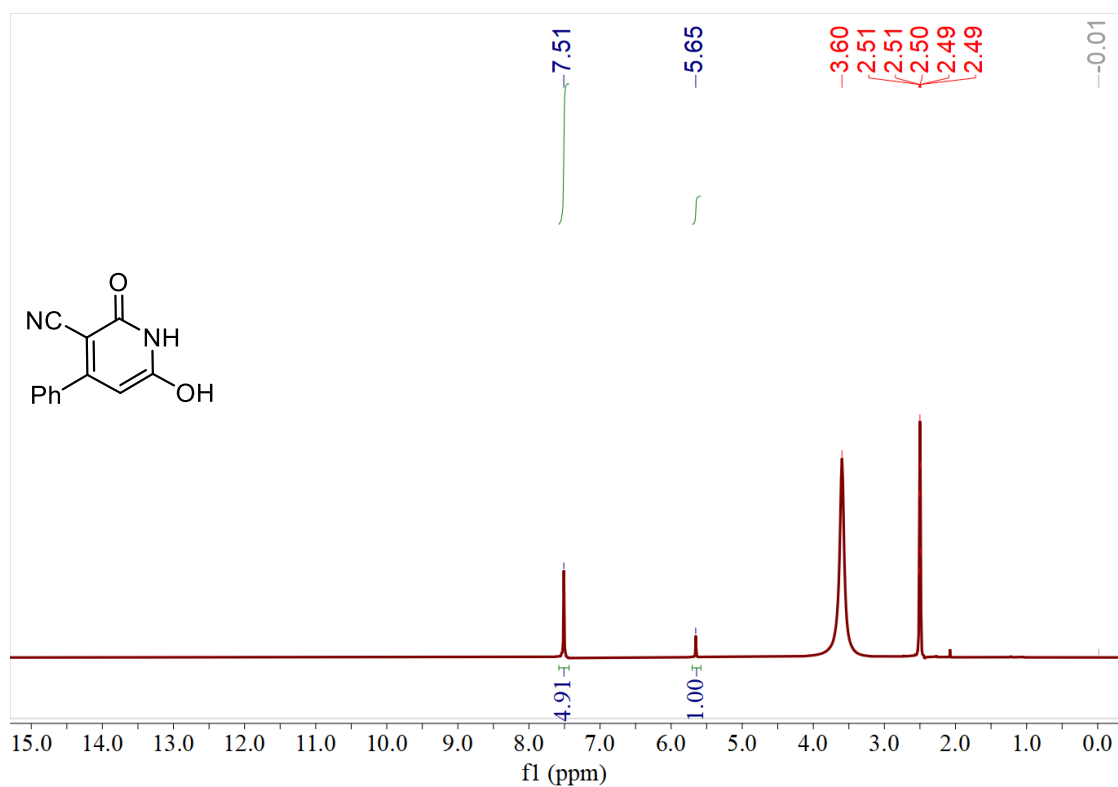

<sup>1</sup>H NMR (300 MHz) spectrum of **6a** in DMSO-*d*<sub>6</sub>

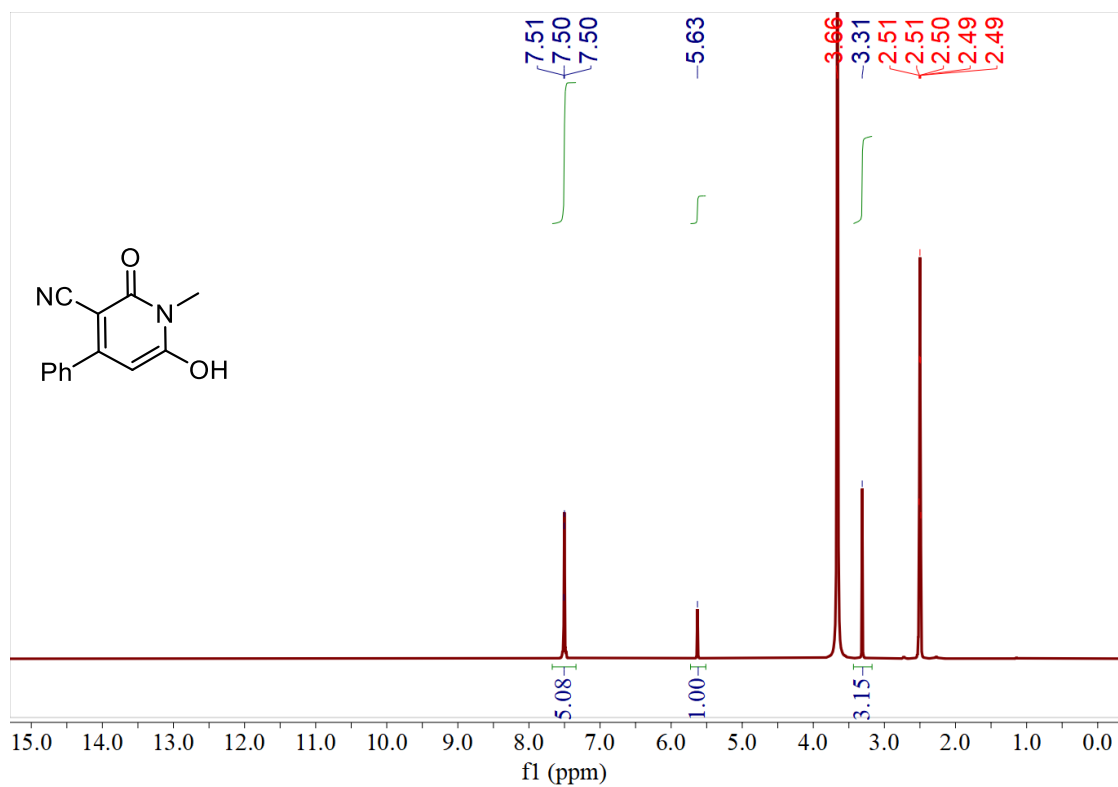

$^1\text{H}$  NMR (300 MHz) spectrum of **6b** in  $\text{DMSO}-d_6$

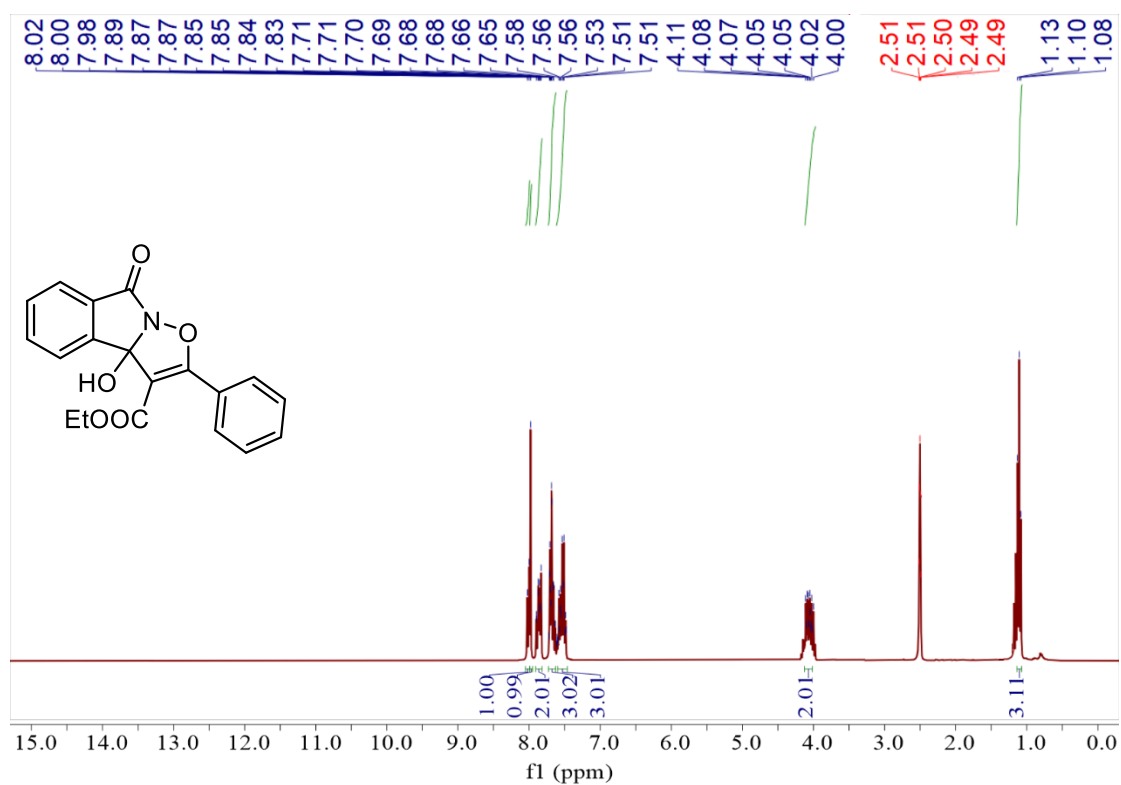

$^1\text{H}$  NMR (300 MHz) spectrum of **7a** in  $\text{DMSO}-d_6$

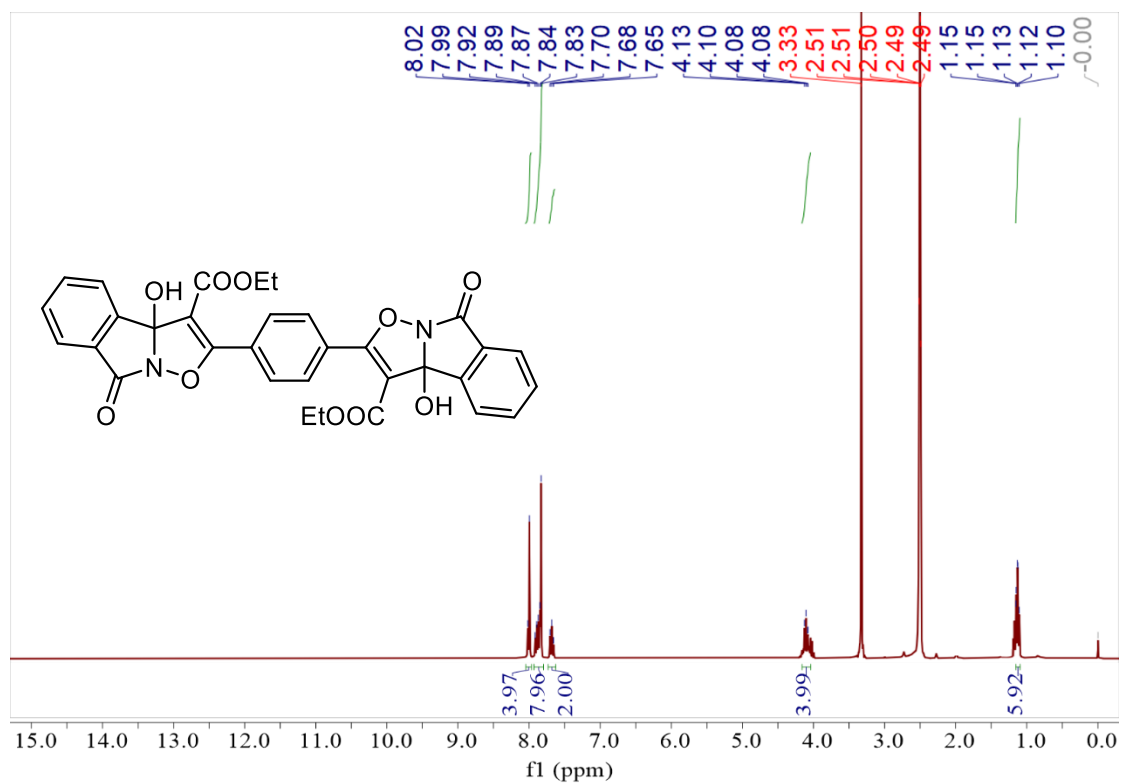

<sup>1</sup>H NMR (300 MHz) spectrum of **7b** in DMSO-*d*<sub>6</sub>

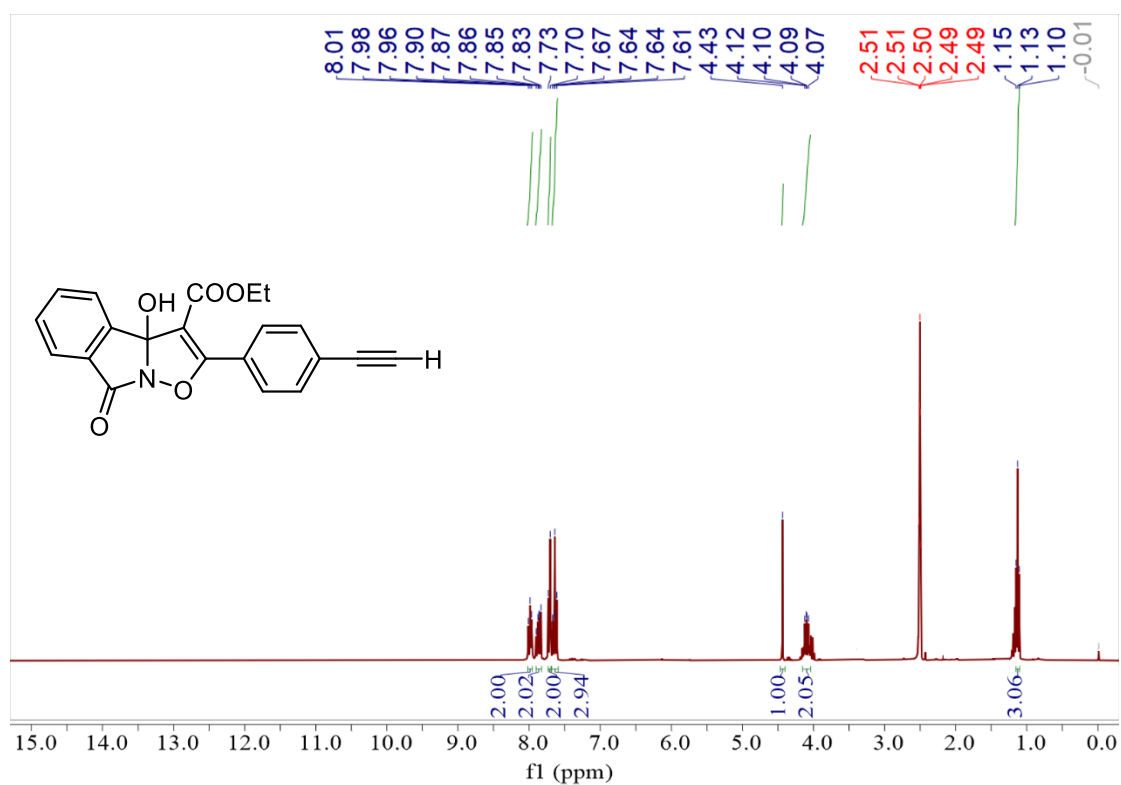

<sup>1</sup>H NMR (300 MHz) spectrum of **7b'** in DMSO-*d*<sub>6</sub>

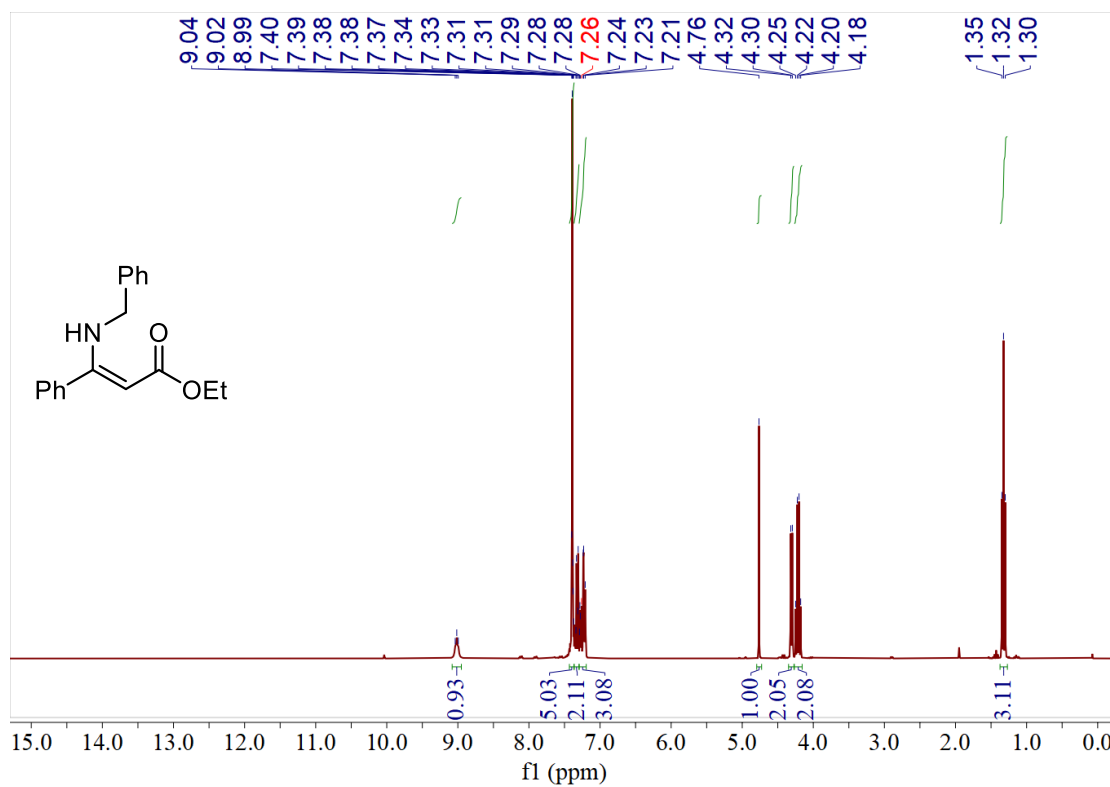

<sup>1</sup>H NMR (300 MHz) spectrum of **8** in Chloroform-*d*

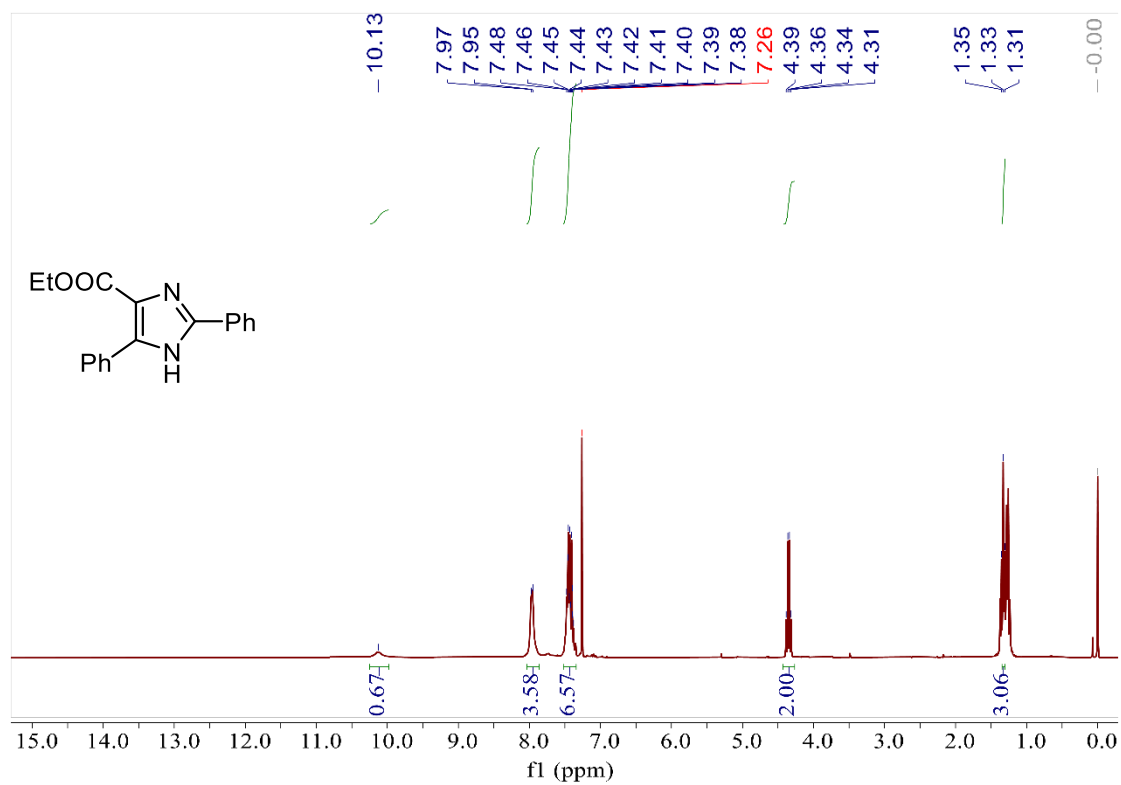

<sup>1</sup>H NMR (300 MHz) spectrum of **9** in Chloroform-*d*
